# Supplementary material for: ANTH domains within CALM, HIP1R, and Sla2 recognize ubiquitin internalization signals
Source: eLife. 2021 Nov 25;10:e72583. doi: 10.7554/eLife.72583 (PMC8648300; doi:10.7554/eLife.72583)
Supplement: Source data 2. [file elife-72583-supp4.xlsx]

## Sheet: Sheet1
Yeast 5795			yeast 5957			yeast 5947			Yeast 6326			Yeast 5797				Yeast 5859			Yeast 5091			Yeast 5887			Yeast 5899			Yeast 5961			Yeast 5860			Yeast 5788			Yeast 6003			Yeast 6014			Yeast 5888
TIME	PM ratio		TIME	PM ratio		TIME	PM ratio		TIME	PM ratio		TIME	PM ratio			TIME	PM ratio		TIME	PM ratio		TIME	PM ratio		TIME	PM ratio		TIME	PM ratio		TIME	PM ratio		TIME	PM ratio		TIME	PM ratio		TIME	PM ratio		TIME	PM ratio
0	1.13081		0	0.621477		0	1.04		0	1.00999		0		1.05629		0	1.02643		0	0.781969		0	0.999874		0	0.900447		0	1.18128		0	0.684263		0	1.31049		0	0.928196		0	0.969114		0	1.01256
0	1.04188		0	0.568882		0	0.96		0	1.13158		0		1.07926		0	1.01003		0	0.88666		0	0.92236		0	1.09955		0	1.15648		0	0.848029		0	1.38278		0	0.923537		0	0.912591		0	0.942247
0	0.625069		0	0.691431		0	1.14		0	0.898861		0		1.05096		0	0.979255		0	0.900447		0	0.980519		0	1.04553		0	1.15389		0	1.04929		0	1.21581		0	0.909357		0	0.923678		0	1.0867
0	1.00918		0	1.21889		0	0.98		0	0.894873		0		1.07139		0	1.00194		0	0.917067		0	0.883035		0	1.02098		0	1.13332		0	1.0322		0	0.679667		0	0.899218		0	0.825386		0	1.01833
0	1.04643		0	0.867339		0	0.93		0	0.881038		0		1.118		0	1.10523		0	0.925399		0	0.927596		0	0.84719		0	0.727401		0	1.04961		0	1.34644		0	0.835662		0	0.866166		0	1.00507
0	0.907393		0	1.46375		0	1.04		0	0.871557		0		1.15908		0	1.00052		0	0.942852		0	1.01486		0	1.03649		0	0.837758		0	1.05883		0	1.00244		0	1.21289		0	0.980802		0	0.978639
0	0.650784		0	0.707124		0	1.01		0	1.06496		0		1.01535		0	0.922643		0	0.957833		0	1.08193		0	0.856709		0	1.05493		0	1.04948		0	1.03786		0	0.683203		0	0.990271		0	0.977894
0	0.961421		0	0.557383		0	0.9		0	1.10419		0		1.02044		0	1.00906		0	0.966394		0	1.16058		0	1.04283		0	1.0067		0	1.0962		0	0.853638		0	0.80206		0	0.989798		0	1.00917
0	1.00232		0	1.25642		0	1.09		0	1.08803		0		1.06958		0	0.9449		0	0.96732		0	1.15669		0	0.960068		0	1.08713		0	1.03785		0	0.944392		0	0.696613		0	0.706137		0	0.969385
0	1.1353		0	1.38124		0	1.07		0	1.10305		0		0.968878		1	1.00173		0	0.979289		0	0.872549		0	1.06281		0	1.02409		0	0.852412		0	1.00112		0	1.19033		0	0.893755		0	0.312689
0	1.06726		0	0.632093		0	1.14		0	1.15678		0		1.14076		1	0.981709		0	0.984912		0	0.962825		0	0.777521		0	1.01916		0	1.17192		0	1.17161		0	0.720864		0	0.970632		0	1.1436
0	1.12352		0	0.806857		0	1.1		0	0.978101		0		1.0952		1	1.10858		0	1.00675		0	1.05513		0	0.391875		0	0.957107		0	0.944648		0	0.843081		0	0.765821		0	0.940437		0	1.10846
0	0.979366		0	1.44076		0	1.02		0	1.03006		0		1.13833		1	1.07075		0	1.00817		0	0.927169		0	0.631482		0	1.19259		0	1.12266		0	1.00512		0	1.14241		0	0.82954		0	1.09452
0	0.946152		0	1.26643		0	0.99		0	0.795291		0		1.04704		1	1.00681		0	1.02874		0	1.03284		0	0.704826		0	0.893191		0	0.820948		0	1.12435		0	0.895073		0	0.962167		0	1.07717
0	0.998225		0	1.49241		0	1.08		0	0.911494		0		1.01588		1	1.06915		0	1.0372		0	0.985022		0	0.622945		0	1.0055		0	1.18166		0	0.802227		0	0.755956		0	0.835584		0	1.09247
0	1.0641		0	1.34004		0	0.86		0	1.02223		0		1.11555		1	0.689412		0	1.0583		0	1.11584		0	0.748957		0	0.922664		2	0.833698		0	0.770038		0	1.0924		0	0.773231		0	0.998575
0	1.00524		0	1.43363		0	0.82		0	1.03772		0		1.12055		1	1.02151		0	1.09933		0	1.0391		0	0.329263		0	0.899879		2	0.785402		0	1.1192		0	0.972947		0	0.924738		0	1.06691
0	1.07977		0	1.2327		0	0.76		0	0.89157		0		1.02148		2	0.954937		0	1.09955		0	1.06477		0	0.288558		0	0.910185		2	0.772542		0	0.54324		0	0.624066		0	0.790105		0	1.04662
0	0.93815		0	1.16485		0	1.06		0	0.906139		0		1.08597		2	0.953121		0	1.12409		0	0.893768		0	0.140653		0	0.906424		2	0.875138		0	0.891298		0	1.20062		0	1.12615		0	1.05898
0	1.11527		0	0.961454		0	0.81		2	0.968038		0		1.20121		2	0.904239		0	1.13149		0	1.03436		0	0.641799		0	0.816106		2	1.0576		0	1.00615		0	1.22364		0	1.08586		0	1.24929
0	0.907431		0	0.60147		0	1.05		2	0.884127		0		0.673635		2	1.02632		0	1.19628		0	1.07702		0	0.533855		0	1.02171		2	0.845968		0	1.22239		0	1.18547		0	0.955864		0	1.31821
0	1.12328		0	1.11822		0	1		2	0.864329		0		1.01547		2	0.987966		2	0.573747		0	1.11298		0	0.452292		0	0.950848		2	0.967951		0	1.31584		0	1.16182		0	1.02234		0	1.15904
0	1.14181		0	0.880383		0	0.79		2	0.975291		0		0.750691		2	0.797016		2	0.731794		0	0.866119		0	0.501229		0	1.03711		2	0.682504		0	0.835908		0	0.969282		0	0.952813		0	0.64793
0	1.12315		0	1.27199		0	0.98		2	1.04814		0		0.850615		2	0.852584		2	0.756743		0	1.04856		0	0.198265		0	1.02122		2	1.05907		0	0.714974		0	1.2573		0	1.06825		0	1.28357
0	1.06577		0	1.30813		0	0.98		2	0.996291		0		0.963549		2	0.981292		2	0.77701		0	1.029		0	0.444322		0	1.04836		2	0.678767		0	0.859931		0	0.878358		0	0.818968		0	0.955631
0	0.629199		0	0.787874		0	0.92		2	1.08473		0		0.876541		2	0.839051		2	0.782135		0	0.953678		0	0.273847		0	1.0114		2	0.58043		0	1.19354		0	1.09341		0	0.954074		0	0.989399
0	1.0152		0	0.532982		0	1.09		2	1.0923		0		1.04341		2	0.909613		2	1.02098		0	1.01342		0	0.496671		0	0.922286		2	0.846957		0	0.992286		0	1.16463		0	1.01919		0	0.813778
0	1.01421		0	0.542734		0	0.97		2	1.05483		0		0.965125		2	1.10339		2	1.03193		0	0.823165		0	0.766523		0	1.05892		2	0.741503		0	1.28209		0	1.00591		0	1.06583		0	0.900294
0	0.915762		0	0.563062		0	0.81		2	1.12286		0		0.954038		2	0.823518		2	1.04382		0	0.956116		0	0.194294		0	1.04235		2	1.08529		0	1.20979		0	1.16755		0	1.1284		0	0.954373
0	0.679883		0	1.16859		0	1.02		2	1.09223		0		1.03163		2	1.06226		2	1.04553		0	1.09815		0	0.619117		2	1.18968		2	0.966165		0	1.2093		0	1.14553		0	1.20109		0	1.1169
0	0.983628		0	0.660066		0	1.1		2	1.05066		0		0.945744		2	0.612053		2	1.05078		0	0.818657		0	0.786791		2	1.14203		2	1.15688		0	0.927885		0	1.04935		0	0.937028		0	0.803713
0	0.996656		0	1.15823		0	1.03		2	0.929532		0		0.85879		2	1.03774		2	1.05306		0	1.03943		0	0.618801		2	1.06606		2	1.09139		0	1.17652		0	0.820522		0	0.669883		0	0.958184
0	1.12812		0	0.808643		0	0.87		2	1.03509		0		0.961826		2	0.96755		2	1.05594		0	1.08044		0	0.636893		2	1.03056		2	0.699102		0	0.921585		0	0.925627		0	0.89788		0	0.849679
0	1.06856		0	1.40217		0	0.86		2	1.11465		0		0.99455		3	0.727816		2	1.12226		0	1.05319		0	0.552707		2	1.05212		2	0.775922		0	0.988543		0	1.08987		0	0.893425		1	0.895499
0	1.12124		0	1.22636		0	0.84		2	1.08927		0		0.940321		3	0.925686		2	1.16762		0	0.919255		0	0.396989		2	1.1052		2	0.604502		0	1.23834		0	1.02784		0	0.836472		2	0.957297
0	0.947014		0	1.4734		0	0.92		2	1.08814		0		0.99264		3	1.03295		2	1.18374		2	0.827801		0	1.09225		2	0.990289		2	1.053		0	0.970195		0	0.92227		0	0.697428		2	0.996654
0	1.01426		0	1.31084		0	0.75		2	1.07967		0		0.784752		3	0.997267		2	1.19423		2	0.936439		0	0.965248		2	1.09656		2	1.11603		0	1.09581		0	0.992642		0	0.886277		2	1.11149
0	1.05762		0	1.21538		0	1.06		2	1.01208		0		0.846675		3	1.0802		2	1.22683		2	0.914973		0	1.05652		2	0.823835		2	0.974189		0	0.800553		0	0.932631		0	0.905056		2	1.12594
0	1.01915		0	0.543878		0	1.04		2	1.05237		0		0.958954		3	0.902558		2	1.31878		2	1.04719		0	0.98146		2	0.88377		2	0.94256		0	1.17896		0	1.28413		0	0.896347		2	1.08748
0	1.00099		0	0.519256		0	1.02		2	0.795051		0		0.952826		3	0.750931		4	0.629947		2	1.13417		0	0.963374		2	1.07389		2	1.03324		0	0.581833		0	0.966576		0	0.587992		2	0.967727
0	0.951335		0	0.447516		0	1.09		2	1.0463		0		0.816726		3	0.654149		4	0.785628		2	1.16166		0	0.942245		2	1.04761		2	1.05967		0	0.593563		0	1.0123		0	1.05652		2	0.991217
0	1.115		0	1.3039		0	1.09		2	0.875949		0		0.939103		3	0.687793		4	0.801017		2	0.980372		0	1.11101		2	1.20058		2	0.900323		0	0.639216		0	0.94128		0	0.9949		2	1.05406
0	0.898259		0	1.32324		0	1.15		2	1.04666		0		1.07551		3	0.781802		4	0.8083		2	1.11813		0	0.617974		2	0.978591		2	1.06179		1	1.06684		0	1.03063		0	1.00699		2	1.02818
0	1.11373		0	0.623584		0	1.06		2	0.834835		0		1.07149		3	1.01047		4	0.827329		2	1.07245		0	1.04538		2	0.686959		2	1.0563		1	0.779008		0	0.845458		0	0.89983		2	1.00732
0	1.14153		0	0.673632		0	1.1		2	0.539013		0		1.02046		3	0.842057		4	0.828144		2	1.01296		0	1.09934		2	0.853529		2	1.14514		1	0.869035		0	0.97132		0	0.944288		2	0.46861
0	1.00335		0	0.920537		0	1.15		2	0.809076		0		0.944047		4	0.751692		4	0.829553		2	1.11994		0	1.13844		2	1.00276		2	1.19482		1	0.746513		0	0.974146		0	1.06926		2	0.414412
0	1.00685		0	0.721873		0	1.05		2	0.878215		0		1.02188		4	0.995132		4	0.835855		2	1.02791		0	1.03978		2	1.17417		2	1.01001		1	0.794328		0	0.832802		0	1.07959		2	0.719714
0	0.974748		0	0.756308		0	1.13		2	0.936101		0		0.99838		4	0.96074		4	0.846457		2	1.11332		0	0.866234		2	1.06985		2	1.02015		1	0.647917		0	1.08658		0	1.07907		3	0.311804
0	1.0978		0	0.899587		0	1.16		2	0.616316		0		1.07302		4	0.94944		4	0.84719		2	1.09509		0	1.19287		2	0.987283		2	0.803347		1	0.939362		0	1.00191		0	0.769826		4	1.09101
0	0.895818		0	0.920276		0	1.06		2	0.856342		0		1.01793		4	0.845787		4	0.874532		2	1.00647		2	0.875894		2	0.980907		2	1.0286		1	0.493416		0	1.01679		0	0.974365		4	1.13136
0	0.904379		0	0.975982		0	1.09		2	1.0737		0		1.04559		4	1.04696		4	0.875894		2	1.01752		2	0.827329		2	1.08108		4	0.70692		1	0.612821		0	0.943986		0	1.05818		4	0.99635
0	0.994397		0	0.334779		0	1.04		2	0.725025		0		1.00695		4	0.876706		4	0.92666		2	0.997733		2	1.0372		2	0.964629		4	0.766373		1	1.05792		0	1.13988		0	1.02526		4	0.989333
0	0.748789		0	0.835593		0	0.9		2	1.00108		0		1.06941		4	0.895994		4	0.929453		2	0.960414		2	0.785628		2	0.930992		4	0.337783		1	0.92561		0	1.11398		0	0.904358		4	1.05176
0	0.691506		0	1.33789		0	1.02		2	1.00108		0		0.946674		4	1.00089		4	0.931504		2	0.938006		2	0.92666		2	0.525697		4	0.354738		1	1.08476		0	1.26904		0	1.04895		4	1.06878
0	0.637024		0	0.988404		0	1.14		2	0.950392		0		1.07591		4	0.741263		4	0.9316		2	0.83944		2	0.917567		2	1.15527		4	0.898496		1	0.955236		0	1.03201		0	0.910948		4	1.05815
0	1.14347		0	0.928142		0	1.01		2	1.08663		0		1.11437		4	0.976261		4	0.934611		2	1.07423		2	0.909056		2	0.986086		4	0.647288		1	0.84199		0	1.21263		0	0.842971		4	0.983328
0	1.14298		0	1.16871		0	1.16		2	0.684747		0		0.827747		4	0.858916		4	0.95727		2	0.895563		2	0.55514		2	0.890393		4	0.538564		1	0.775721		0	1.28913		0	1.00814		4	0.950167
0	1.2358		0	1.12137		0	1.08		2	0.893253		0		1.22985		4	0.907822		4	0.959995		2	0.6994		2	0.840562		2	1.00378		4	0.784908		1	0.815726		0	0.945887		0	0.861367		4	0.28265
0	1.18001		0	0.872095		0	1.06		2	1.01138		0		1.18937		4	0.722135		4	0.966076		2	1.10252		2	0.576342		2	0.946203		4	0.945445		1	1.00228		0	0.918091		0	1.22772		4	0.3801
0	1.05781		0	1.54119		0	1.13		2	1.16182		0		0.874993		4	0.917269		4	0.988158		2	0.822785		2	0.588552		2	0.946802		4	0.801506		1	1.20517		0	0.958698		0	1.18379		4	0.538276
0	0.984142		0	1.30633		0	0.88		2	1.10276		0		1.18074		4	0.779323		4	0.990663		2	1.06071		2	0.880038		2	1.08071		4	0.976071		1	0.686656		0	1.07387		0	1.04208		4	0.195495
0	1.07114		0	1.21318		0	1.02		2	1.00986		0		0.689741		5	0.902411		4	1.025		2	0.892811		2	0.7748		4	1.05159		4	0.995582		1	0.510915		0	0.772843		0	1.11455		4	0.351169
0	0.867363		0	1.58706		0	0.99		2	1.08056		0		1.08589		5	0.927195		4	1.02624		2	1.08071		2	0.26951		4	1.06083		4	0.985538		1	0.691301		0	0.691972		0	1.03875		4	0.793302
0	1.08963		0.000129275			0	1.15		4	1.0332		0		0.731397		5	0.899086		4	1.0372		2	0.964777		2	0.546231		4	1.07112		4	0.991337		1	0.963043		0	1.00196		0	1.1646		4	0.309743
0	1.273		0.00104856			0	1.06		4	0.897		0		0.964735		5	0.621562		4	1.06072		2	1.10683		2	0.338987		4	1.11975		4	0.98165		1	0.896486		0	0.799508		0	0.892834		4	0.103163
0	0.913667		0.00215458			0	1.08		4	0.993152		0		0.945973		5	0.794967		4	1.08539		2	1.05776		2	0.619879		4	0.708793		4	0.742616		1	0.5435		0	0.748112		0	1.04012		4	0.255336
0	1.03736		0.00271477			0	0.94		4	1.04395		0		0.987037		5	0.785703		4	1.10612		4	0.970261		2	0.226595		4	0.82079		4	0.819546		1	0.725474		0	1.12522		0	1.11112		4	0.145482
0	1.01369		0.00287278			0	1.1		4	1.01885		0		0.972836		5	0.785347		4	1.12455		4	0.761133		2	0.08282		4	0.967387		4	0.758458		1	1.02751		0	1.16002		0	1.16196		4	0.290197
0	0.989997		0.00311696			0	1.07		4	1.10828		0		1.01114		5	0.994788		4	1.18108		4	0.938109		2	0.0863422		4	1.11517		4	0.854665		1	0.536816		0	0.877604		0	1.23017		4	0.635404
0	0.902246		0.00371675			0	1.08		4	0.802823		0		1.11828		5	0.936532		4	1.20154		4	0.795716		2	0.143637		4	1.08895		4	0.901189		1	1.10605		0	1.02052		0	1.30942		4	0.404391
0	1.03148		0.00386389			0	0.96		4	0.800658		0		0.941905		5	0.54954		4	1.2632		4	0.712511		2	0.556037		4	1.06218		4	0.803745		1	0.648289		0	0.938985		0	1.02154		4	0.260477
0	1.05023		0.0049526			0	1.03		4	0.892354		0		0.994056		5	0.979243		6	0.366536		4	1.0139		2	0.487348		4	0.808962		4	1.06381		1	0.97469		0	0.926723		0	0.730301		4	0.236373
0	1.10006		0.00508482			0	1		4	0.839633		0		1.07661		5	0.661094		6	0.494383		4	0.826252		2	0.198928		4	0.910653		4	0.973639		1	0.697016		0	0.764759		0	0.978862		4	0.53545
0	0.911931		0.00554446			0	1		4	0.874253		0		0.970858		5	0.838376		6	0.521053		4	0.92602		2	0.132435		4	0.446127		4	0.754062		1	0.660137		0	1.04851		0	0.974006		5	0.15447
0	0.983716		0.00885035			0	0.95		4	0.900329		0		1.06491		5	0.968016		6	0.53206		4	0.907212		2	0.00853615		4	0.580284		4	1.04553		1	1.0119		0	0.760477		0	0.911916		5	0.126993
0	1.06562		0.00951695			0	0.85		4	0.85681		0		1.1995		7	0.743177		6	0.604985		4	0.853528		2	0.992505		4	0.830654		4	0.882214		1	0.631847		0	0.980482		0	0.760331		5	0.404956
0	1.06918		0.0103707			0	0.98		4	0.758709		0		0.972504		7	0.785642		6	0.6396		4	1.06239		2	0.317876		4	0.968311		4	1.01173		1	0.939415		0	0.977365		0	0.966213		5	0.0781651
0	0.985492		0.0123087			0	0.99		4	0.871025		0		0.736378		7	0.356663		6	0.658679		4	1.0014		2	0.454018		4	0.995272		4	1.03453		1	0.634654		0	0.888668		0	0.986686		5	0.128671
0	0.585683		0.0126259			0	1.08		4	0.636025		0		1.04327		7	0.560288		6	0.662076		4	0.971526		2	0.849541		4	1.06456		4	0.966838		1	0.526656		0	1.05063		0	0.977192		5	0.358425
0	1.06274		0.0126402			0	0.83		4	0.779595		1		0.975196		7	0.411618		6	0.698887		4	0.938622		2	1.09003		4	1.02417		4	1.00269		1	1.01252		0	0.932066		0	0.641024		5	0.305367
0	1.33839		0.0127982			0	0.87		4	0.931253		1		0.944488		7	0.785716		6	0.741907		4	0.937089		2	0.975891		4	0.991161		6	0.608707		1	0.975876		0	0.918005		2	1.05579		5	0.0752296
0	0.95851		0.0182565			0	0.81		4	0.827532		1		1.01879		7	0.47126		6	0.811806		4	1.04917		2	1.0644		4	1.03763		6	0.722886		1	1.20502		0	1.063		2	0.579669		5	0.283524
1	0.923897		0.018946			0	0.94		4	0.553013		1		0.880228		7	0.729951		6	0.873601		4	1.03655		2	1.12278		4	1.01565		6	0.760286		1	0.548295		0	1.0767		2	0.990414		6	0.371991
1	0.976704		0.0211005			0	1.02		4	1.02994		1		0.99829		7	0.684075		6	0.887939		4	1.07033		2	1.06854		4	0.979658		6	0.795116		1	0.859055		0	1.07963		2	1.1186		6	0.498255
1	0.845813		0.0221778			0	1.04		4	0.893228		1		1.03601		7	0.164461		6	0.909056		4	0.926645		2	0.938849		4	0.990432		6	0.787601		1	1.1211		0	1.04094		2	0.970503		6	0.243594
1	0.89287		0.0224651			0	1.02		4	0.856405		1		1.073		7	0.135259		6	0.913989		4	0.972076		2	0.987379		4	0.914206		6	0.864654		1	1.14649		0	0.961421		2	1.10398		6	0.2039
1	0.85559		0.0262141			0	0.77		4	0.702658		1		1.0513		9	0.680038		6	0.917567		4	0.944545		2	1.06115		4	0.700049		6	0.424784		1	1.28346		0	1.03696		2	1.09891		6	0.0776546
1	1.02102		0.0320315			0	0.87		4	0.924709		1		1.08076		9	0.183601		6	0.91832		4	0.980855		2	1.01948		4	0.773413		6	0.724507		1	0.952131		0	1.01153		2	1.2211		6	0.162365
1	1.09436		0.0358397			1	1.15		4	0.797443		1		1.13475		9	0.53051		6	0.993163		4	1.02454		2	1.00704		4	0.954778		6	1.05072		1	1.04257		0	1.00919		2	1.12899		6	0.0617554
1	1.01671		0.0379925			1	0.98		4	1.01737		1		1.12171		9	0.271574		6	1.06414		4	0.951018		2	0.952849		4	1.02677		6	0.782984		1	1.03904		0	0.705982		2	0.987922		6	0.150678
1	1.09404		0.0392709			1	1.02		4	0.701759		1		1.11837		9	0.733067		6	1.06913		4	0.858126		2	1.17658		4	1.00951		6	0.992656		2	0.754966		0	0.768082		2	1.08979		6	0.0751384
1	0.937276		0.0399603			1	0.99		4	0.961671		1		1.02219		9	0.304689		6	1.07414		4	1.07438		2	1.11025		4	1.16787		6	0.35449		2	1.01621		0	1.03354		2	1.01098		6	0.374981
1	0.888483		0.0403769			1	0.98		4	1.01152		1		1.11388		9	0.548349		6	1.16268		4	0.89728		2	1.08898		4	1.01907		6	0.485487		2	0.480927		0	1.05889		2	1.0494		6	0.275957
1	0.936015		0.0408796			1	0.84		4	1.01141		1		0.835148		9	0.375312		8	0.507667		4	1.07385		2	1.06891		4	0.944498		6	0.419989		2	1.05691		0	0.714819		2	0.842417		6	0.116199
1	0.95131		0.0409371			1	1.16		4	0.743051		1		1.14841		9	0.22825		8	0.57527		4	0.868805		2	1.02065		4	1.04426		8	0.24567		2	1.00328		0	1.29018		2	0.802467		6	0.24786
1	0.799696		0.0409802			1	0.99		4	0.433367		1		0.976118		9	0.234115		8	0.609816		4	1.02777		2	1.12993		4	1.05797		8	0.689731		2	1.05123		0	1.25868		2	0.895431		6	0.375163
1	0.950423		0.0426462			1	0.9		4	0.63481		1		0.932253		9	0.213269		8	0.682254		9	0.367857		4	0.993163		4	1.02127		8	0.643166		2	0.725742		0	1.09838		2	0.780766		6	0.14034
1	0.920495		0.0453195			1	1.08		4	0.410114		1		1.0579		9	0.502118		8	0.796603		9	0.134498		4	1.07414		6	1.01819		8	0.593071		2	0.663429		0	1.29376		2	0.956323		6	0.491345
1	0.980735		0.0454365			1	1.05		4	0.905063		1		0.985948		12	0.149884		8	0.856709		9	0.462576		4	0.741907		6	1.0299		8	0.336848		2	0.59052		0	1.27776		2	0.951137		6	0.523653
1	0.855342		0.0462714			2	0.97		4	0.976228		1		1.02209		12	0.370221		8	0.874421		9	0.0989001		4	0.609816		6	0.907752		8	0.665123		2	0.141495		0	1.15123		2	1.17495		7	0.240531
1	0.908483		0.0477777			2	1.09		4	1.09899		1		1.09672		12	0.128805		8	0.912635		9	0.883529		4	0.57527		6	0.963444		8	0.59439		2	1.22514		0	1.21479		2	0.991059		7	0.587524
1	0.835074		0.0489521			2	1.04		4	1.04221		1		1.09311		12	0.142596		8	0.960068		9	0.43743		4	0.750612		6	0.948675		8	0.857922		2	0.945616		0	1.15245		2	0.954618		7	0.101923
1	0.986329		0.0507861			2	1.11		4	1.15301		1		1.13392		12	0.378245		8	0.967043		9	0.218138		4	0.652504		6	1.01674		8	0.221295		2	0.730256		0	1.19167		2	0.960276		7	0.0414255
1	1.01605		0.0511642			2	0.92		4	1.04008		1		0.856626		12	0.296284		8	1.03649		9	0.351377		4	0.543703		6	0.960751		8	0.456152		2	0.441891		2	1.02532		2	1.07365		7	0.287736
1	0.937047		0.0514863			2	1		4	1.13324		1		1.01699		12	0.27388		8	1.04283		9	0.838339		4	0.825037		6	1.11565		8	0.189446		2	0.537254		2	0.43047		2	1.09492		7	0.0820488
1	0.919582		0.0519398			2	1.03		4	0.507405		1		0.925174		12	0.103309		8	1.06281		9	0.55556		4	0.844581		6	0.974557		8	0.423053		2	0.833097		2	1.30621		2	0.982679		7	0.452107
1	0.940905		0.0522223			2	0.95		4	0.916848		1		1.16308		15	0.0698626		8	1.09855		9	0.777669		4	0.143664		6	1.06491		8	0.729275		2	0.539319		2	1.27524		2	1.04275		7	0.436007
1	0.971681		0.0534969			2	0.96		6	0.824038		1		1.0171		15	0.0788194		10	0.194294		9	0.312577		4	0.766416		6	0.820413		10	0.611991		2	0.973693		2	1.11859		2	0.979341		7	0.0690304
1	0.822123		0.0536405			2	0.76		6	0.650835		1		1.02076		15	0.141418		10	0.202658		9	0.53576		4	0.539725		6	0.962924		10	0.128551		2	0.548481		2	1.14561		2	1.05237		7	0.0993337
1	0.96273		0.0536469			2	0.85		6	0.698696		1		0.680874		15	0.0906718		10	0.317876		9	0.579173		4	0.285657		6	0.654415		10	0.588743		2	0.552554		2	1.36879		2	0.913121		8	0.0676264
1	1.17716		0.0549562			2	0.86		6	0.440544		1		0.83257		15	0.133247		10	0.36001		9	0.692612		4	1.19628		6	0.643654		10	1.01008		2	0.611501		2	1.21278		2	1.1408		8	0.02425
1	0.950702		0.0626265			2	0.76		6	0.708		1		1.02642		15	0.0723902		10	0.382983		9	0.23039		4	0.984912		6	0.996717		10	0.373328		2	0.87592		2	1.29261		2	1.14082		8	0.0645815
1	0.927849		0.0636119			2	0.41		6	0.514987		1		0.704169		15	0.0552497		10	0.392852		9	0.498768		4	0.88666		6	0.904954		10	0.567185		2	0.949671		2	1.19228		2	1.07408		8	0.147013
1	0.995834		0.063902			2	0.96		6	0.761506		1		0.899328		15	0.130081		10	0.444577		9	0.650012		4	1.00675		6	1.10862		10	0.256236		2	0.658341		2	1.17221		2	1.03642		8	0.525586
1	1.13638		0.0657148			2	0.94		6	0.379278		1		0.717058		15	0.0524399		10	0.454018		9	0.622376		4	0.925399		6	0.907674		10	0.366211		2	0.952367		2	1.07995		2	0.886722		8	0.502813
1	1.00164		0.0689079			2	1		6	0.585937		1		0.776216		15	0.241967		10	0.458376		9	0.694643		4	1.04382		6	1.01826		10	0.310193		2	0.823821		2	1.49501		2	0.866825		8	0.541248
1	1.02116		0.0691908			2	0.86		6	0.880139		1		0.734743		15	0.0423421		10	0.514207		9	0.567406		4	1.05078		6	0.736848		10	0.475416		2	0.5533		2	1.23866		2	1.15101		8	0.122617
1	0.849882		0.0693106			2	0.91		6	0.57362		1		0.701951		22	0.0328455		10	0.543703		9	0.705572		4	1.19423		6	0.828663		10	0.262831		2	0.268049		2	1.14383		2	0.631951		8	0.162019
1	1.11225		0.0737729			2	1.09		6	0.87243		1		1.00592		22	0.0021717		10	0.552707		9	0.462104		4	1.16762		6	0.87284		10	0.370442		2	0.346653		2	1.33137		2	1.07974		8	0.168783
1	0.812594		0.0740908			2	1.08		6	0.578937		1		0.95285		22	0.0862547		10	0.55514		9	0.668462		4	0.847566		6	0.746386		10	0.326777		2	0.572776		2	1.31643		2	1.21949		8	0.0320355
1	0.918312		0.0757498			2	0.94		6	0.709709		1		0.724004		22	0.0663781		10	0.555645		9	0.510902		4	0.662884		6	0.96835		10	0.431503		2	0.474453		2	1.20222		2	1.05804		8	1.04098
1	0.974518		0.0763986			2	0.47		6	0.771101		1		0.967172		22	0.0286493		10	0.560471		9	0.602249		4	0.548535		6	0.691383		12	0.239322		2	0.459631		2	1.35969		2	1.20355		8	0.0262009
1	0.792111		0.0794914			2	1.06		6	0.851506		1		1.03376		22	0.0476548		10	0.56496		9	0.633095		4	0.402963		6	0.751994		12	0.185709		2	0.583454		2	1.26324		2	1.19802		8	0.114905
1	0.940648		0.0795051			2	0.99		6	0.90857		1		1.03314					10	0.576342		9	0.53061		4	0.716687		6	1.03609		12	0.31944		2	0.724755		2	1.27682		2	1.33124		8	0.394983
1	0.889081		0.0809267			2	1.09		6	0.684304		1		1.09244					10	0.588552		9	0.641586		4	0.71343		6	0.775807		12	0.174964		3	0.327076		2	1.41261		2	1.23081		8	0.147815
1	1.04806		0.0875257			2	0.99		6	0.927899		1		1.0884					10	0.618801		15	0.371744		4	0.437349		6	0.868988		12	0.329072		3	0.492976		2	1.41987		2	1.07703		8	0.14282
1	1.21951		0.0885194			2	0.96		6	0.887747		1		1.00417					10	0.619117		22	0.224991		4	1.13646		6	0.773348		12	0.700146		3	0.503534		2	1.15586		2	1.18809		9	1.06826
1	0.892773		0.0904273			2	1.02		6	0.379367		1		1.03695					10	0.636893		22	0.0427838		4	0.741149		6	0.883419		12	0.401838		3	0.127552		2	1.4421		2	1.10217		9	1.08076
1	0.640601		0.092288			2	1.04		6	0.367797		1		1.05162					10	0.652504		22	0.17217		4	1.05497		6	0.698501		12	0.143857		3	0.96325		2	1.06077		2	1.14405		9	1.05319
1	0.984917		0.0932404			2	1.04		6	0.505759		1		1.0169					10	0.657025		22	0.219776		4	0.997112		6	1.07836		12	0.0850914		3	0.345533		2	1.22335		2	0.918397		9	1.03152
1	1.16273		0.0955548			2	1.12		6	0.365		1		1.07022					10	0.718918		22	0.141953		4	1.06825		6	1.00792		12	0.543208		3	0.770153		2	1.29595		2	0.874844		9	1.02792
1	0.898404		0.0965563			2	1.04		6	0.835532		1		1.11201					10	0.750612		22	0.0397699		4	0.950377		6	0.819372		12	1.2648		3	0.449579		2	1.23212		2	0.976192		9	1.04717
1	0.93473		0.0980358			2	1		6	0.982253		1		1.02121					10	0.766523		22	0.119729		4	0.981902		6	0.906646		12	0.338181		3	0.269239		2	1.38388		2	0.851185		9	0.0595856
1	0.960039		0.0988523			2	1.13		6	0.728329		1		0.916862					10	0.7748		22	0.456915		4	1.09216		6	0.714233		12	0.398815		3	0.390326		2	1.33227		2	1.04258		9	0.0652197
1	1.08211		0.102087			2	1.09		6	0.896962		1		1.02194					10	0.786791		22	0.106651		4	1.10042		6	0.944954		12	0.247305		3	0.664729		2	1.10686		2	1.03692		9	0.0448169
1	1.12144		0.108115			2	1.11		6	0.44181		1		0.748084					10	0.78766		22	0.0455487		4	1.06858		6	0.961987		12	0.288003		3	0.527404		2	1.43154		2	1.28092		9	0.235681
1	0.94952		0.114587			2	0.97		6	0.651608		1		1.03407					10	0.815191		22	0.107844		4	0.494282		6	0.853881		12	0.416609		3	0.367375		2	1.0301		2	1.08045		9	0.0669883
1	1.03813		0.115018			2	1.05		6	0.929658		1		0.965158					10	0.820367		22	0.0634615		4	1.02736		6	0.917615		12	0.404572		3	0.72469		2	1.2837		2	1.04072		9	0.121487
1	1.09326		0.118155			2	1.08		8	0.547924		1		1.21312					10	0.825037		22	0.180203		4	1.02014		6	0.897303		12	0.108889		3	0.436956		2	1.35516		2	1.04689		9	0.185211
1	1.13124		0.118556			2	0.96		8	0.582165		1		0.878289					10	0.840562		22	0.240153		4	1.02042		6	1.05872		12	0.551988		3	0.282837		2	1.32722		2	1.17049		9	0.0609531
1	1.09687		0.121325			2	1.06		8	0.408266		1		0.958929					10	0.844581		22	0.0652305		4	1.08444		6	1.02706		12	0.539925		3	0.310991		2	1.18307		2	1.19368		9	0.0565407
1	0.963683		0.12246			2	1.13		8	0.771823		1		1.02862					10	0.880038		22	0.0206384		4	0.952881		8	0.827284		12	0.310907		3	0.918839		2	1.25216		2	1.07131		9	0.453438
1	0.774468		0.123988			2	1.03		8	0.831051		1		0.963096					10	0.935606		22	0.226223		4	0.9916		8	0.953945		12	0.347318		3	0.426077		2	1.27221		2	1.1368		9	0.0596586
2	1.07898		0.127603			2	1.08		8	0.63043		1		1.16034					10	0.992505		22	0.340554		4	0.964106		8	0.816093		12	0.270127		3	0.289204		2	1.53075		2	1.06767		9	0.0447439
2	0.892548		0.130361			2	0.97		8	0.585924		1		1.16664					12	0.253709		22	0.185313		4	0.850479		8	0.894804		12	0.0349269		3	0.387376		2	0.929103		2	1.14728		9	0.190463
2	0.710794		0.130511			2	0.94		8	0.446886		1		1.21469					12	0.306991		22	0.178735		4	0.937273		8	0.930367		12	0.0721072		3	0.14979		2	1.06454		2	0.995478		9	0.430045
2	0.828692		0.134788			2	0.94		8	0.803468		1		1.20226					12	0.33139		22	0.223314		6	0.657025		8	0.826932		12	0.282754		3	1.03827		2	1.06373		2	1.2437		9	0.183297
2	0.986763		0.134906			2	1.05		8	0.696203		1		1.12581					12	0.387746		22	0.217234		6	0.815191		8	0.984537		12	0.537712		3	0.481003		2	1.12215		2	1.24371		9	0.199105
2	0.843279		0.140881			2	1.11		8	0.749544		1		1.08533					12	0.391875		22	0.0400713		6	0.514207		8	0.864499		14	0.199792		3	0.957211		2	1.29045		2	1.17096		10	0.207802
2	0.469056		0.145386			2	1.05		8	0.840949		1		1.16401					12	0.396989		22	0.132466		6	0.444577		8	0.862469		14	0.846119		3	0.334823		2	1.27175		2	1.1299		10	0.31556
2	0.723092		0.150419			2	1		8	0.684975		1		1.13872					12	0.53141		22	0.0452473		6	0.820367		8	0.570356		14	0.0985428		3	0.401179		2	0.96077		2	0.966698		10	0.0498492
2	1.02034		0.151781			2	1.16		8	0.904152		1		1.07837					12	0.634562		30	0.0368478		6	0.555645		8	0.732424		14	0.291149		3	0.461787		2	1.02784		2	0.945007		10	0.0920587
2	0.97242		0.154929			2	1.14		8	0.739418		1		0.984077					12	0.642573		30	0.0122389		6	0.36001		8	0.660505		14	0.0625717		3	0.571005		2	1.42685		4	1.04934		10	0.432105
2	0.634717		0.168964			2	1.1		8	0.859899		1		1.10142					12	0.662884		30	0.0266006		6	0.202658		8	0.525333		14	0.2913		3	0.386841		2	1.36418		4	0.878542		10	0.0212233
2	0.747636		0.169724			2	1.08		8	0.81138		1		0.971665					12	0.671579		30	0.00947402		6	0.935606		8	0.674142		14	0.230336		3	0.453432		2	1.29499		4	0.894428		10	0.129983
2	1.10076		0.170598			2	1.18		8	0.892076		1		0.997432					12	0.713341					6	0.560471		8	0.85012		14	0.099642		3	0.386557		2	1.28636		4	0.99199		10	0.136912
2	0.863728		0.170729			2	1.08		8	0.636823		1		0.995453					12	0.739054					6	0.56496		8	0.539269		14	0.0992711		3	0.931511		2	1.27649		4	0.953071		10	0.106189
2	0.711212		0.1711			2	1.07		8	0.913835		1		0.936599					12	0.777521					6	0.78766		8	0.960243		14	0.094256		3	0.858571		2	1.30962		4	1.13575		10	0.0977657
2	0.827936		0.17883			2	1.05		8	0.716494		1		0.926115					12	0.784248					6	0.53141		8	0.739359		14	0.696656		3	0.522863		2	1.03801		4	1.04801		10	0.0113957
2	1.00031		0.18634			2	0.95		8	0.697241		1		0.981959					12	0.789994					6	0.642573		8	1.04508		14	0.151126		3	0.42464		2	1.26146		4	0.99272		10	0.0978933
2	0.843665		0.186817			2	0.7		8	0.544734		1		1.09959					12	0.847566					6	0.33139		8	0.840803		14	0.733218		3	0.912177		2	1.29357		4	0.999968		10	0.0912018
2	0.508244		0.190964			2	1.01		8	0.626747		1		1.00727					12	0.849541					6	1.31878		8	0.775638		14	0.115841		4	0.564642		2	1.21919		4	1.01126		10	0.012125
2	0.723996		0.191016			2	1.03		8	0.609949		1		0.961799					12	0.865977					6	0.801017		8	0.837485		14	0.126325		4	0.205071		2	1.35293		4	0.985343		10	0.0830881
2	1.01737		0.195496			2	0.99		8	0.603595		1		1.04003					12	0.960054					6	1.2632		8	0.828416		16	0.390544		4	0.36837		2	1.29937		4	0.943803		10	0.17336
2	0.970549		0.197549			2	1.15		8	0.405481		1		0.998465					12	0.964916					6	1.20154		8	1.09704		16	0.548072		4	0.83216		2	1.38501		4	0.984455		10	0.398721
2	1.01321		0.198595			2	1.12		8	0.237241		2		0.948081					14	0.140653					6	0.95727		8	0.776015		16	0.182563		4	0.324915		2	1.31054		4	0.762889		10	0.0710542
2	1.06636		0.203545			2	1.01		8	0.518405		2		1.10443					14	0.288558					6	0.309063		8	0.904173		16	0.413682		4	0.108216		2	1.40184		4	1.02312		10	0.0270579
2	0.599707		0.213629			2	1.07		8	0.268063		2		1.01825					14	0.329263					6	0.234132		8	0.955208		16	0.48366		4	0.267843		2	1.36586		4	0.895803		15	1.03505
2	0.804866		0.214058			2	1.14		8	0.490342		2		1.01157					14	0.370573					6	0.55014		8	0.956314		16	0.139694		4	0.152608		2	1.31051		4	0.995886		15	1.10802
2	0.99253		0.214122			2	0.78		8	0.559367		2		1.00091					14	0.402963					6	0.584094		8	1.07136		16	0.262763		4	0.304412		2	1.49953		4	0.976147		15	1.05835
2	0.936511		0.214975			2	0.81		8	0.750759		2		0.887133					14	0.533985					6	0.942852		8	0.925032		16	0.11793		4	0.666527		2	0.956351		4	0.999997		15	0.991078
2	0.880793		0.215555			2	0.91		8	0.714443		2		0.799538					14	0.548535					6	1.09933		8	0.90865		16	0.0921675		4	0.424199		2	1.25748		4	1.09939		15	0.959939
2	1.10142		0.216737			2	0.97		8	0.687038		2		0.73863					14	0.620486					6	0.951261		8	0.905253		16	0.337178		4	0.273236		2	1.43656		4	1.19456		15	1.05415
2	0.864103		0.217412			2	1.04		8	0.484025		2		0.765411					14	0.622945					6	0.966237		8	0.98187		16	0.215456		4	0.247951		2	1.28259		4	0.963871		15	1.01271
2	0.870164		0.218274			2	1.03		8	0.396013		2		0.933095					14	0.631482					6	0.928258		8	0.835937		16	0.811618		4	0.561678		2	1.18343		4	0.682989		15	1.01693
2	0.731826		0.218509			2	1.05		8	0.486025		2		0.78586					14	0.704826					6	1.04096		8	0.820335		16	0.261128		4	0.308046		4	1.06582		4	1.14399		15	0.969725
2	0.952843		0.219517			2	1.07		8	0.795873		2		1.07235					14	0.71343					6	0.705851		8	0.886438		16	0.160812		4	0.474654		4	0.97966		4	0.957781		15	0.963972
2	1.01698		0.226812			2	1.05		8	0.289835		2		1.09987					14	0.716687					6	0.869254		8	0.81133		16	0.646643		4	0.329371		4	1.13928		4	0.975099		15	0.879292
2	0.912767		0.226966			2	1.02		8	0.904519		2		1.01571					14	0.748957					6	0.854955		8	0.820686		16	0.0771223		4	0.364449		4	1.10343		4	1.08146		15	1.08463
2	0.70169		0.22744			2	1.08		8	0.91243		2		0.983704					16	0.198265					6	0.812189		8	0.819138		16	0.121695		4	0.436879		4	1.32662		4	1.03903		15	1.05481
2	0.571812		0.228218			2	0.97		8	0.677949		2		0.611164					16	0.234132					6	1.08101		8	1.07617		16	0.24251		4	0.670773		4	1.04267		4	1.23818		15	1.0613
2	0.77644		0.228745			2	1.1		8	0.487544		2		0.952609					16	0.273847					6	1.04163		8	0.966099		16	0.0724507		4	0.352265		4	1.26334		4	1.14253		22	0.95039
2	0.717706		0.229268			2	1.09		8	0.863899		2		0.987631					16	0.309063					6	0.889031		8	0.874713		16	0.0165841		4	0.359935		4	1.24861		4	1.08226		22	0.888654
2	0.759462		0.231228			4	1.12		8	0.832987		2		0.982329					16	0.437349					6	0.970739		8	0.952072		16	0.223425		4	0.365168		4	1.28136		4	1.09016		22	0.913766
2	1.01133		0.234374			4	1.05		10	0.923696		2		1.0582					16	0.444322					6	0.747733		8	0.920035		16	0.330033		4	0.407946		4	1.23229		4	1.10246		22	0.905684
2	1.02924		0.235826			4	1.09		10	0.313253		2		0.632455					16	0.452292					6	0.992402		8	0.895377		16	0.114028		4	0.418574		4	1.49994		4	1.07421		22	0.842984
2	1.07693		0.238582			4	1.08		10	0.306203		2		0.770673					16	0.460493					6	0.750504		8	1.0194		16	0.2237		4	0.465931		4	1.47194		4	1.02893		22	0.826943
2	1.05326		0.239116			4	0.97		10	0.465975		2		0.881617					16	0.501229					6	0.938719		8	1.02771		18	0.385364		4	0.326267		4	1.40564		4	1.07325		22	0.912582
2	0.738324		0.241429			4	1.12		10	0.268924		2		1.10467					16	0.533855					6	1.02555		8	0.96131		18	0.0188924		4	0.430856		4	1.4698		4	0.831697		22	0.965198
2	0.82577		0.242011			4	1.07		10	0.615139		2		1.10241					16	0.55014					6	0.895003		8	0.885631		18	0.02557		4	0.392957		4	0.353402		4	1.11539		22	0.861088
2	1.13273		0.243428			4	0.97		10	0.330278		2		1.15605					16	0.574426					6	0.976112		8	0.917446		18	0.0371253		4	0.340671		4	1.2711		4	0.976598		22	0.849466
2	1.08884		0.247576			4	1.13		10	0.502177		2		1.11512					16	0.584094					6	0.823105		8	0.923119		18	0.182082		4	0.29034		4	1.13005		4	1.08571		22	0.862041
2	1.00013		0.252229			4	1.13		10	0.383354		2		0.589833					16	0.641799					6	1.00639		8	0.99863		18	0.0104836		4	0.260078		4	1.34419		4	1.06419		22	0.872023
2	0.895224		0.255648			4	1.04		10	0.346494		2		0.847316					16	0.681965					8	0.718918		8	0.847492		18	0.0360124		4	0.15228		4	1.31054		4	1.09019		22	0.957702
2	1.01752		0.255977			4	0.92		10	0.602911		2		0.957124					16	0.712829					8	0.634562		10	0.902234		18	0.034501		4	0.319483		4	1.39568		4	1.19855		22	0.869949
2	1.0975		0.257947			4	1.09		10	0.406658		2		0.922195					16	0.728343					8	0.713341		10	0.938083		18	0.0202114		4	0.465012		4	1.28566		4	1.3023		22	0.923428
2	1.007		0.269883			4	0.91		10	0.329		2		0.719636					16	1.02639					8	0.306991		10	0.791344		18	0.034501		4	0.184414		4	1.16567		4	1.05081		22	0.843071
2	1.08579		0.270443			4	0.95		10	0.301937		2		0.939346					18	0.08282					8	0.533985		10	0.993867		18	0.0289913		4	0.428934		4	1.23251		4	0.74459		22	0.931317
2	1.03187		0.272612			4	1		10	0.602215		2		0.58274					18	0.086342					8	0.370573		10	0.715052		18	0.595874		4	0.177028		4	1.17968		6	0.894055		22	0.937979
2	1.12751		0.274508			4	1.19		10	0.343595		2		0.719129					18	0.143637					8	0.960054		10	0.885188		18	0.0381833		4	0.459965		4	1.10177		6	0.8893		22	0.97171
2	0.785015		0.274665			4	0.89		10	0.248291		2		0.664939					18	0.198928					8	0.784248		10	0.96822		18	0.242235		4	0.436387		4	0.832733		6	0.954016		22	0.891846
2	1.18137		0.280087			4	0.88		10	0.454835		2		0.557188					18	0.226595					8	0.811806		10	0.908155		18	0.647687		4	0.306783		4	0.61749		6	0.973784
2	1.37067		0.285681			4	1.06		10	0.818582		2		0.526788					18	0.26951					8	0.682254		10	0.782261		18	0.166047		4	0.129354		4	1.29602		6	0.886478
2	1.40858		0.2961			4	1.04		10	0.743063		2		0.686511					18	0.338987					8	0.796603		10	0.43089		18	0.15386		4	0.659903		4	0.913313		6	0.917246
2	1.39776		0.297964			4	0.84		10	0.530304		2		0.637624					18	0.487348					8	0.874421		10	1.02356		18	0.270388		4	0.503061		4	1.15933		6	0.883112
2	1.38629		0.298642			4	1.07		10	0.362861		2		0.914857					18	0.496671					8	0.912635		10	0.607922		18	0.0581199		4	0.500203		4	1.43248		6	0.915671
2	1.42449		0.3032			4	1.04		10	0.891494		2		1.09946					18	0.546231					8	0.957833		10	0.819333		18	0.43579		4	1.04456		4	1.4182		6	0.972222
2	0.765436		0.306419			4	1.05		10	0.412177		2		0.859166					18	0.550427					8	1.18374		10	0.742612		18	0.379387		4	0.32102		4	1.47711		6	1.01707
2	1.42325		0.308606			4	1		10	0.739519		2		0.905753					18	0.556037					8	1.05306		10	0.962247		20	0.321212		4	0.396583		4	1.26658		6	0.850381
2	1.37767		0.312811			4	1.01		10	0.12238		2		0.91655					18	0.58053					8	1.12226		10	0.890445		20	0.379703		4	0.439545		4	1.40366		6	1.11024
3	0.817796		0.31694			4	1.01		10	0.639886		2		0.678845					18	0.619879					8	1.22683		10	0.555443		20	0.0474028		5	0.162037		4	1.28545		6	0.799717
3	0.963351		0.31955			4	1.15		10	0.670962		2		1.00238					18	0.718475					8	1.00817		10	0.962638		20	0.00802412		5	0.133214		4	1.23083		6	0.978138
3	0.909232		0.32076			4	1.05		10	0.695747		2		0.759529					18	0.725963					8	0.917067		10	0.653908		20	0.0036823		5	0.424792		4	1.3487		6	1.15551
3	0.912706		0.323977			4	0.97		10	0.872949		2		0.833376					18	0.790223					8	1.0372		10	0.801792		20	0.272916		5	0.0819938		4	1.37977		6	1.20019
3	0.990198		0.324882			4	1.01		10	0.886076		2		0.941481					20	0.008536					8	0.950715		10	0.527467		20	0.0311347		5	0.134973		4	1.25036		6	1.18131
3	0.706176		0.328732			4	0.85		10	0.675038		2		1.06608					20	0.132435					8	0.860342		10	0.996287		20	0.296027		5	0.375982		4	1.28146		6	0.959875
3	1.01711		0.331691			4	1.02		10	0.446443		2		0.821035					20	0.143664					8	0.934738		10	0.836574		20	0.22201		5	0.320325		4	1.30337		6	0.79234
3	0.696644		0.331921			4	1.01		10	0.674608		2		0.876028					20	0.255588					8	0.925253		10	0.964876		20	0.368959		5	0.0789145		4	0.31247		6	0.745371
3	0.704607		0.335462			4	1.02		10	0.593823		2		0.900573					20	0.285657					8	0.940814		10	0.872176		20	0.561675		5	0.297412		4	0.692452		6	0.761185
3	0.837967		0.337049			4	0.99		10	0.595886		2		0.872902					20	0.539725					8	0.921636		10	0.853816		20	0.414713		5	0.494774		4	0.681097		6	0.685367
3	1.0228		0.340263			4	0.95		10	0.476203		2		1.18231					20	0.589415					8	0.805891		10	0.979072		20	0.0622282		5	0.168616		4	1.04411		6	0.705507
3	0.952094		0.341842			4	0.93		10	0.816797		2		0.891777					20	0.621538					8	1.0257		10	0.466908		20	0.347991		5	0.487908		4	1.22102		6	0.774979
3	0.930256		0.344822			4	0.94		10	0.575		2		1.19066					20	0.657675					8	0.986885		10	0.594819		20	0.363861		5	0.454017		4	1.29545		6	0.568339
3	0.989956		0.352576			4	0.93		10	0.447595		2		1.10584					20	0.766416					8	0.871895		10	0.572359		20	0.117037		5	0.609723		4	1.15997		6	0.619175
3	0.710119		0.354041			4	1.02		10	0.268861		2		1.07323											8	1.00781		10	0.815989		20	0.161417		5	0.455221		4	1.29168		6	0.775523
3	0.984451		0.354989			4	0.68		10	0.666165		2		1.21158											8	0.943		10	0.463459		20	0.0622831		5	0.281977		4	1.07374		6	0.963699
3	0.693297		0.357509			4	0.86		10	0.666165		2		1.28137											8	0.806099		10	0.36035		20	0.371006		5	0.579847		4	1.0544		6	0.99918
3	0.793225		0.357962			4	0.96		12	0.301506		2		1.09943											10	0.620486		10	0.750576		20	0.422118		5	0.5682		4	0.550081		6	1.12523
3	0.740457		0.358436			4	1.01		12	0.059316		2		1.16516											10	0.574426		10	0.682977		20	0.429002		5	0.255315		4	1.31367		6	0.692429
3	0.921702		0.362994			4	0.92		12	0.520089		2		1.13017											10	0.460493		10	0.974388		20	0.112915		5	0.201993		4	1.18581		6	0.980817
3	0.757882		0.370467			4	1.01		12	0.149835		2		1.09615											10	0.712829		10	0.472542		20	0.00724095		5	0.19718		4	0.884112		6	0.974693
3	0.595383		0.373567			4	1.05		12	0.652684		2		1.09778											10	1.02639		10	0.819736		20	0.00736461		5	0.416753		4	0.84652		6	0.969508
3	0.576423		0.380514			4	0.98		12	0.45119		2		1.12773											10	0.728343		10	0.958539		20	0.209108		5	0.359854		4	1.32118		6	1.04006
3	0.714474		0.382714			4	0.86		12	0.085595		2		1.06189											10	0.681965		10	0.850901		20	0.0862868		5	0.316926		4	1.39612		6	1.06161
3	0.959019		0.383186			4	0.94		12	0.444608		2		0.976381											10	0.387746		10	0.903301		20	0.285406		5	0.176861		6	1.08418		6	0.966432
3	0.771183		0.384038			4	1.04		12	0.818228		2		1.29298											10	0.964916		10	0.802742		20	0.235626		5	0.277707		6	1.37213		6	0.999975
3	1.09301		0.387571			4	1.02		12	0.494848		2		1.18074											10	0.789994		10	1.01906		20	0.0163093		5	0.471144		6	0.893224		6	0.962762
3	0.671799		0.390277			4	0.47		12	0.494063		2		1.17559											10	0.671579		10	0.802977		20	0.107007		5	0.235347		6	1.07898		6	0.998258
3	0.990404		0.393059			4	0.82		12	0.420203		2		1.10035											10	1.0583		10	1.04631		20	0.320429		5	0.248798		6	1.08266		6	1.05991
3	1.04364		0.394156			4	0.95		12	0.276759		2		1.23165											10	0.979289		10	0.966502					5	0.385254		6	0.762036		6	1.1088
3	1.0677		0.401729			4	0.96		12	0.320329		2		0.934246											10	0.573747		12	0.523056					5	0.275769		6	0.702813		6	0.92708
3	0.745371		0.406469			4	1.03		12	0.157873		2		0.882784											10	0.756743		12	0.885032					5	0.0846874		6	1.04669		6	1.21037
3	0.857423		0.428559			4	0.92		12	0.473937		2		1.05988											10	1.03193		12	0.441937					5	0.264389		6	1.04121		6	0.871846
3	0.964204		0.428663			4	0.97		12	0.164962		2		0.905464											10	0.733616		12	0.59262					5	0.305613		6	0.993378		6	1.06636
3	0.449072		0.429842			4	0.9		12	0.21162		2		0.980283											12	0.550427		12	0.55046					5	0.234494		6	1.24772		6	1.25973
3	0.546847		0.438055			4	0.82		12	0.212063		2		0.740504											12	0.790223		12	0.504188					5	0.403401		6	0.820334		6	1.30844
3	0.74787		0.449015			4	0.75		12	0.112633		2		0.983912											12	0.725963		12	0.647883					6	0.390212		6	0.728982		6	1.28786
3	0.803386		0.449841			4	0.89		12	0.15362		2		0.997671											12	0.718475		12	0.854935					6	0.52266		6	1.02647		6	1.04645
3	0.880118		0.450631			4	1.01		12	0.162899		2		1.03982											12	0.58053		12	0.471163					6	0.255525		6	0.775925		6	0.863803
3	0.617302		0.451328			4	0.88		12	0.419418		2		0.848789											12	0.657675		12	0.306258					6	0.213888		6	1.15339		6	0.812598
3	1.03011		0.454293			4	0.84		12	0.254861		2		0.89042											12	0.731794		12	0.652841					6	0.0814583		6	1.27437		6	0.829838
3	1.04474		0.455309			4	0.77		12	0.166772		2		0.821712											12	0.835855		12	0.277644					6	0.170318		6	1.02085		6	0.747182
3	0.891365		0.455824			4	0.97		12	0.204291		2		1.11651											12	0.846457		12	0.750589					6	0.0647803		6	0.820334		6	0.769139
3	1.05628		0.461042			4	0.8		12	0.382051		2		1.04406											12	0.8083		12	0.805059					6	0.158058		6	0.721943		6	0.844877
3	1.11031		0.465031			4	0.86		12	0.186418		2		1.10097											12	0.988158		12	0.912319					6	0.0788189		6	0.937255		6	0.619599
3	1.05422		0.466122			4	0.91		12	0.075696		2		1.10564											12	0.959995		12	0.926476					6	0.393348		6	0.804098		6	0.67502
3	1.12654		0.467631			4	0.84		12	0.173658		2		1.02231											12	0.874532		12	0.664708					6	0.289474		6	1.15339		6	0.84547
3	1.13726		0.467645			4	0.92		12	0.313025		2		0.967933											12	0.990663		12	0.892358					6	0.121891		6	1.27437		6	1.05062
3	0.975316		0.470908			4	1.11		12	0.521975		2		1.09453											12	0.929453		12	0.896496					6	0.260001		6	1.02085		6	1.0893
3	0.899198		0.471706			4	0.96		12	0.481975		2		1.09444											12	0.629947		12	0.99349					6	0.39354		6	1.21419		6	1.22672
3	1.05604		0.472112			4	0.89		12	0.48219		2		1.11413											12	0.658679		12	0.884629					6	0.147214		6	1.40275		6	0.754881
3	1.05133		0.488384			4	1.05		12	0.506456		2		0.992233											12	0.366536		12	1.01307					6	0.515411		6	1.27911		6	1.06928
3	0.752594		0.48965			4	0.77		12	0.677468		2		1.07569											12	0.505835		12	0.930562					6	0.549303		6	1.12779		8	0.968469
3	1.01648		0.493832			4	0.98		12	0.586266		2		1.09076											14	0.621538		12	0.751552					6	0.234563		6	1.38173		8	1.1068
3	0.702405		0.49959			4	0.97		12	1.03085		2		1.07697											14	0.589415		12	0.375769					6	0.355938		6	1.07762		8	1.02683
3	1.04394		0.502765			6	1.22		12	0.726215		2		1.10349											14	0.255588		12	0.807375					6	0.495941		6	1.19155		8	1.02264
4	0.789521		0.510363			6	0.85		12	0.875899		2		0.951008											14	0.966394		12	0.755417					6	0.466621		6	1.21134		8	0.899857
4	0.792763		0.521567			6	0.94		12	0.594797		2		0.98562											14	1.1315		12	0.744799					6	0.0450674		6	1.22167		8	0.402036
4	0.656714		0.531302			6	1.08		12	0.750013		3		1.08901											14	0.96732		12	0.8531					6	0.227677		6	0.995793		8	1.01628
4	0.419877		0.539364			6	0.66		14	0.545253		3		0.965005											14	1.02874		14	0.72351					6	0.0956994		6	0.94486		8	1.09452
4	0.971031		0.544048			6	0.9		14	0.331278		3		0.997409											14	0.781969		14	0.670615					6	0.217149		6	1.35738		8	1.05397
4	0.694959		0.544843			6	0.96		14	0.120987		3		0.936127											14	1.12409		14	0.34791					6	0.139881		6	0.804886		8	1.02483
4	0.995227		0.54939			6	1.07		14	0.30343		3		0.292385											14	0.253709		14	0.940621					6	0.129705		6	0.95344		8	1.02592
4	0.982467		0.551916			6	1.09		14	0.40462		3		1.07805											14	0.865977		14	0.729002					6	0.13034		6	1.0128		8	1.0116
4	0.931281		0.55311			6	1.04		14	0.212962		3		0.693109											14	0.739054		14	0.766867					6	0.129655		6	1.07156		8	1.03654
4	0.795644		0.554035			6	0.77		14	0.116291		3		1.05462											14	0.494383		14	0.600726					6	0.107547		6	1.28523		8	0.792755
4	0.751727		0.555753			6	0.78		14	0.338671		3		0.382411											14	0.521053		14	0.34307					6	0.0609087		6	1.16642		8	0.945479
4	0.928644		0.564644			6	0.91		14	0.415253		3		0.642206											14	0.53206		14	0.272309					6	0.0846539		6	1.18834		8	0.800734
4	1.06837		0.569129			6	0.99		14	0.470392		3		0.509423											14	0.652272		14	0.799125					6	0.0223248		6	1.16903		8	0.75981
4	0.782075		0.574354			6	0.84		14	0.178468		3		0.96037											14	0.447117		14	0.71517					6	0.0225421		6	1.41912		8	0.834868
4	0.794421		0.574959			6	0.87		14	0.221456		3		0.717953											14	0.711862		14	0.900634					6	0.248765		6	1.16779		8	0.868931
4	0.657133		0.577138			6	0.97		14	0.173443		3		0.895628											14	0.622608		14	0.729965					6	0.0829495		6	1.21614		8	0.945049
4	0.700872		0.579884			6	0.82		14	0.170987		3		0.863905											14	0.670084		14	0.977394					6	0.29146		6	1.03443		8	0.835942
4	0.981776		0.581824			6	0.97		14	0.50081		3		0.932828											14	0.676121		14	0.73435					6	0.461753		6	1.1282		8	1.02498
4	0.994997		0.58257			6	0.7		14	0.455		3		0.898794											14	0.557085		14	0.914869					6	0.10885		6	0.961472		8	1.08275
4	0.997904		0.582596			6	0.84		14	0.362494		3		1.04589											14	0.429045		14	0.467441					6	0.266812		6	0.771678		8	1.00789
4	0.931092		0.585845			6	1.15		14	0.315152		3		0.831835											14	0.505861		14	0.762196					6	0.222864		6	0.771318		8	0.968684
4	0.795		0.588215			6	0.75		14	0.433532		3		0.94939											16	1.05594		14	0.589341					6	0.579092		6	1.10383		8	1.01011
4	0.938474		0.593439			6	0.69		14	0.017899		3		1.05428											16	0.782135		14	0.95012					6	0.258273		6	0.657874		8	0.823352
4	0.933651		0.595508			6	1.17		14	0.020924		3		0.844952											16	0.77701		14	0.671448					6	0.0670915		6	0.736449		8	0.79711
4	1.0512		0.596187			6	0.88		16	0.18662		3		0.955601											16	1.06072		14	0.252881					6	0.218135		6	0.777039		8	1.0163
4	0.262443		0.61002			6	0.94		16	0.279633		3		1.00005											16	1.08539		14	0.297774					6	0.35693		6	1.05601		8	0.983381
4	0.637455		0.623103			6	0.83		16	0.344646		3		0.932039											16	0.9316		14	0.049681					6	0.436638		6	0.939088		8	0.78406
4	0.782272		0.624816			6	0.96		16	0.300304		3		0.7933											16	1.02624		14	0.087456					6	0.27871		6	0.972382		8	0.848032
4	0.752897		0.632111			6	1.04		16	0.379772		3		0.601961											16	1.18108		14	0.47599					6	0.284107		8	0.742324		8	0.751258
4	0.739625		0.634434			6	0.91		16	0.370456		3		0.904177											16	0.828144		14	1.01683					6	0.0983062		8	0.669263		8	0.863789
4	0.775793		0.636541			6	0.81		16	0.100114		3		0.634111											16	0.6396		14	0.757134					7	0.252312		8	0.656949		8	1.04422
4	0.652523		0.63682			6	0.95		16	0.288177		3		0.880575											16	0.698887		14	0.386713					7	0.616302		8	1.38297		8	0.994926
4	0.632111		0.637264			6	0.79		16	0.045582		3		0.609828											16	0.394866		14	0.437279					7	0.106915		8	0.821499		8	1.05582
4	0.838736		0.637455			6	0.93		16	0.068747		3		0.916545											16	0.255611		14	0.338411					7	0.0434546		8	0.755819		8	1.20662
4	1.00309		0.639758			6	0.46		16	0.198823		3		0.641885											16	0.326559		14	0.50722					7	0.30183		8	1.11458		8	1.11944
4	0.736178		0.641855			6	0.81		16	0.17781		3		0.779289											16	0.208421		14	0.624682					7	0.0860677		8	0.891494		8	1.11488
4	0.814317		0.645101			6	0.99		16	0.108633		3		0.684133											16	0.50577		16	0.804161					7	0.474252		8	1.06695		8	0.981017
4	0.555753		0.652063			6	0.98		16	0.076063		3		0.932828											16	0.746536		16	1.00442					7	0.457364		8	0.842924		8	0.438296
4	0.574354		0.652523			6	0.97		16	0.206367		3		0.842868											16	0.422085		16	0.8166					7	0.0724116		8	1.28081		8	1.10794
4	0.890029		0.654879			6	1.04		16	0.076114		3		0.875045											16	0.196828		16	0.268873					7	0.104199		8	1.2096		8	1.19324
4	0.714862		0.657224			6	0.86		16	0.257747		3		0.867619											16	0.617065		16	0.600479					7	0.0219377		8	0.863458		8	1.14903
4	0.956319		0.659663			6	0.96		16	0.04762		3		0.737655											16	0.500527		16	0.701142					7	0.0807124		8	0.835765		8	1.11727
4	0.6983		0.659848			6	0.85		16	0.180734		3		0.884368											16	0.569107		16	0.213974					7	0.0112653		8	1.22392		8	1.11845
4	1.06152		0.66025			6	1.06		16	0.233481		3		0.899408											16	0.693452		16	0.299218					7	0.0727176		8	1.17759		8	1.10284
4	1.06064		0.663995			6	0.95		16	0.217734		3		0.706399											16	0.653144		16	0.279127					7	0.431486		8	0.829034		8	1.13003
4	0.671885		0.667318			6	1.02		16	0.429835		3		0.579183											16	0.878427		16	0.323291					7	0.4894		8	0.896426		8	0.864256
4	0.297964		0.669904			6	0.87		16	0.45443		3		0.878992											16	0.425545		16	0.517044					7	0.0577227		8	1.10617		8	1.03075
4	0.834283		0.671885			6	0.98		16	0.337127		3		0.664163											18	1.12455		16	0.354846					7	0.15146		8	0.921277		8	0.872954
4	0.757925		0.67572			6	1.18		16	0.13081		3		0.779093											18	1.10612		16	0.501325					7	0.28343		8	1.00102		8	0.828339
4	0.876082		0.677674			6	0.9		16	0.088266		3		0.824223											18	1.025		16	0.416303					7	0.386501		8	1.16557		8	0.910167
4	0.918145		0.677846			6	0.87		16	0.335797		3		0.880137											18	0.829553		16	0.463616					7	0.207251		8	1.06577		8	0.947302
4	0.999722		0.678186			6	0.79		16	0.017456		3		0.740451											18	0.966076		16	0.637668					7	0.0312815		8	1.0059		8	1.03029
4	1.01653		0.6798			6	1.02		16	0.221215		3		0.895779											18	0.931504		16	0.131034					7	0.0519186		8	0.997266		8	0.911339
4	1.07628		0.68102			6	1.01		16	0.209468		3		0.95188											18	0.934611		16	0.123942					7	0.103904		8	1.47478		8	1.11742
4	0.544843		0.688389			6	1.01		16	0.069481		3		0.929427											18	0.91832		16	0.111659					7	0.137341		8	1.46271		8	1.1804
4	1.0322		0.688887			6	0.95		16	0.064646		3		0.998604											18	0.604985		16	0.179062					7	0.124458		8	1.1636		8	1.09879
4	1.05606		0.694495			6	0.85		16	0.128203		3		0.905156											18	0.507667		16	0.096538					7	0.134801		8	1.11568		8	1.05605
4	0.940417		0.698258			6	0.7		16	0.222633		3		0.995179											18	0.382983		16	0.090657					7	0.040823		8	1.28531		8	1.10121
4	1.00866		0.6983			6	0.79		16	0.020861		3		0.967975											18	0.392852		16	0.072309					7	0.385672		8	0.932255		8	0.897612
4	0.985638		0.699066			6	0.75		16	0.045949		3		1.00645											18	0.571215		16	0.447272					7	0.413193		8	1.02376		8	0.869003
4	1.0599		0.69923			6	0.89		16	0.118177		3		1.00657											20	1.06415		16	0.393206					7	0.298444		8	1.04138		8	1.10796
4	1.05907		0.705726			6	0.9		16	0.167304		3		0.838738											20	0.887939		16	0.858032					7	0.622572		8	1.00465		8	1.07207
4	1.09007		0.711905			6	1.08		16	0.041962		3		1.08632											20	0.913989		16	0.494116					7	0.425225		8	1.21837		8	0.854777
4	1.19126		0.714862			6	1.1		16	0.001101		3		0.729509											20	0.662076		16	0.562431					7	0.778729		8	0.678254		8	0.924519
4	0.946662		0.723877			6	1.04		16	0.222696		3		1.05155											20	1.06913		16	0.540401					7	0.0562633		8	0.699045		8	0.819016
4	1.38257		0.724614			6	1.03		16	0.418797		3		0.913048											20	1.16268		16	0.071112					7	0.0939114		8	0.657685		8	0.941696
4	1.06107		0.725745			6	0.83		16	0.341772		3		1.08101											20	0.873601		16	0.242068					7	0.0633651		8	0.469005		8	1.1384
4	1.26486		0.725922			6	0.94		16	0.164747		3		1.06525											20	0.967043		16	0.078998					7	0.0546591		8	0.952309		8	1.08466
4	0.724614		0.731571			6	0.82		16	0.263962		3		0.903872											20	1.09855		16	0.606074					7	0.33011		8	0.912731		10	1.06749
4	0.577138		0.736178			6	0.88		16	0.304658		3		0.501048											20	0.458376		16	0.568495					7	0.200088		8	1.03537		10	0.857271
4	1.19147		0.737241			6	0.94		16	0.595241		3		0.995649											20	0.0342055		16	0.718774					7	0.0755803		8	1.13583		10	0.839223
4	1.14722		0.738936			6	1.06		16	0.549481		3		1.01402											20	0.253204		18	0.213779					7	0.107814		8	1.05779		10	0.857543
4	0.659663		0.739625			6	1.01		16	0.394316		3		1.31255														18	0.330825					7	0.10753		8	0.912833		10	0.959273
5	0.748267		0.741219			6	1.07		16	0.310911		3		1.18694														18	0.229954					7	0.255499		8	0.893686		10	0.931714
5	0.663995		0.748267			6	0.88		16	0.119241		4		0.993295														18	0.11486					7	0.0226758		8	0.915351		10	0.758062
5	0.942408		0.752897			6	1.09		16	0.595241		4		0.716818														18	0.318658					7	0.0935103		8	0.797008		10	0.814442
5	0.831908		0.753382			6	1.03		16	0.549481		4		1.09948														18	0.530486					7	0.302004		8	1.2214		10	0.916458
5	0.971378		0.757925			6	1		18	0.316962		4		1.09307														18	0.333323					7	0.511249		8	0.689318		10	1.05314
5	0.769183		0.761487			6	1.03		18	0.177658		4		0.642099														18	0.634688					7	0.430839		8	1.32035		10	0.868759
5	0.790524		0.762191			6	1.06		18	0.18262		4		1.04532														18	0.62977					8	0.0709389		8	0.730849		10	0.902278
5	0.667318		0.763139			6	1.11		18	0.092835		4		0.614877														18	0.258685					8	0.0254378		8	0.90987		10	0.813683
5	0.956955		0.769183			6	1.13		18	0.124241		4		1.12447														18	0.766295					8	0.0677448		8	0.968443		10	0.815831
5	0.836424		0.775793			6	1.05		18	0.239899		4		1.00649														18	0.494025					8	0.154214		8	1.26187		10	0.534419
5	0.992258		0.777603			6	0.63		18	0.222658		4		0.8759														18	0.461104					8	0.55133		8	1.13659		10	0.936441
5	0.753382		0.779945			6	0.62		18	0.274177		4		1.10995														18	0.062082					8	0.527442		8	1.12689		10	1.00071
5	0.588215		0.780749			6	0.56		18	0.129709		4		0.627753														18	0.621832					8	0.56776		8	0.997026		10	0.884788
5	0.6798		0.780892			6	0.82		18	0.141519		4		0.691787														18	0.042134					8	0.128623		8	1.2419		10	0.915828
5	0.585845		0.782272			6	1.02		18	0.127089		4		0.660398														18	0.473023					8	0.169955		8	0.928812		10	1.05069
5	0.677674		0.783372			6	0.99		18	0.013051		4		1.01397														18	0.755117					8	0.177051		8	0.841759		10	0.984713
5	0.937229		0.789347			6	1.03		18	0.125646		4		0.845673														18	0.479426					8	0.0336046		8	0.659004		10	1.02991
5	1.07514		0.790434			6	1.15		18	0.024722		4		0.889431														18	0.057684					8	1.09197		10	0.660614		10	0.531225
5	0.895947		0.790524			6	0.95		18	0.271709		4		0.739632														18	0.007794					8	0.0274843		10	0.676524		10	0.962783
5	0.737241		0.79168			6	1		18	0.088684		4		0.778901														18	0.029122					8	0.120533		10	0.747907		10	0.55082
5	0.945733		0.791931			6	1.17		18	0.076709		4		0.740446														18	0.148457					8	0.41433		10	0.540182		10	0.907821
5	0.797698		0.797698			6	1.05		18	0.126291		4		0.622798														18	0.115016					8	0.155056		10	0.693034		10	1.01898
5	0.596187		0.798357			6	1.05		18	0.349823		4		0.835629														18	0.222667					8	0.149815		10	1.03765		10	0.981003
5	0.880793		0.805211			6	1.04		18	0.433835		4		0.593653														18	0.27374					8	0.316174		10	0.613225		10	0.813783
5	0.705726		0.807658			6	1.04					4		0.643969														18	0.586569					8	0.458932		10	1.21261		10	1.16377
5	1.02848		0.810152			8	1.08					4		0.807966														18	0.415431					8	0.381108		10	1.15207		10	0.934591
5	0.780749		0.814317			8	0.98					4		0.767788														18	0.838617					8	0.0515844		10	0.49603		10	0.914915
5	0.652063		0.822246			8	0.84					4		0.742456														18	0.667063					8	0.191014		10	0.885123		10	0.934888
5	0.449015		0.831908			8	0.92					4		0.872342														18	0.740752					8	0.175123		10	1.08504		10	1.04579
5	0.521567		0.834228			8	1.1					4		0.881819														18	0.16428					8	0.132946		10	0.882759		10	1.01575
5	0.438055		0.834283			8	1.02					4		0.898755														18	0.106011					8	0.13303		10	0.922886		10	0.826434
5	0.659848		0.834992			8	1.03					4		0.820587														18	0.436342					8	0.0955156		10	0.573287		10	0.887899
5	0.358436		0.836424			8	1.1					4		0.635658														18	0.038438					8	0.0405223		10	0.610571		10	0.999117
5	0.762191		0.838736			8	0.98					4		0.910386														18	0.209524					8	0.352769		10	0.469964		10	1.14813
5	0.54939		0.842239			8	0.92					4		0.764958														18	0.797993					8	0.0734915		10	0.674212		10	0.947115
5	0.48965		0.876082			8	0.92					4		0.568946														18	0.339764					9	0.0625043		10	0.686937		10	0.983657
5	0.272612		0.880793			8	0.82					4		0.837473														18	0.212556					9	0.0684142		10	0.820111		10	0.887071
5	0.810152		0.881007			8	0.95					4		0.892578														18	0.115198					9	0.0470121		10	0.470272		10	0.889414
5	0.807658		0.890029			8	0.81					4		0.781521														18	0.324917					9	0.247225		10	0.716377		10	0.58262
5	0.789347		0.895947			8	0.9					4		0.869287														18	0.498736					9	0.0702695		10	0.699354		10	1.0209
5	0.645101		0.898594			8	0.88					4		1.17068														18	0.405125					9	0.127438		10	0.674983		10	1.09097
5	1.08417		0.899861			8	0.69					4		0.719041														18	0.396342					9	0.194283		10	0.534136		10	0.964589
5	1.0482		0.899914			8	0.68					4		0.961586														18	0.753296					9	0.0639387		10	0.880208		10	0.998429
5	0.921351		0.905041			8	0.74					4		1.06562														18	0.360025					9	0.0593102		10	1.09554		10	1.14545
5	0.96522		0.918145			8	0.94					4		1.20037														18	0.094495					9	0.475648		10	1.13602		10	1.07353
5	0.531302		0.919607			8	0.65					4		1.11416														18	0.036682					9	0.0625808		10	1.07821		10	1.1228
5	1.02293		0.921351			8	0.86					4		0.930355														18	0.053403					9	0.0469356		10	0.767499		10	0.579138
5	0.791931		0.92853			8	0.98					4		0.960294														18	0.110409					9	0.199792		10	0.907815		10	1.04962
5	1.03796		0.93109			8	0.88					4		1.12208														18	0.033572					9	0.451109		10	0.643248		10	0.600501
5	1.11202		0.932087			8	0.84					4		0.846622														18	0.041197					9	0.192275		10	0.535934		10	0.9897
5	1.08776		0.937229			8	0.97					4		1.06629														18	0.185777					9	0.208858		10	1.00038		10	1.11088
5	0.636541		0.940417			8	0.73					4		1.13052														18	0.63396					9	0.144269		10	0.723605		10	1.06948
5	0.69923		0.942408			8	0.72					4		0.92099														18	0.737421					9	0.257361		10	1.21147		10	0.88718
5	0.551916		0.945733			8	0.82					4		0.797924														20	0.744512					9	0.174124		10	1.00196		12	0.499454
5	0.449841		0.946662			8	0.84					4		1.13379														20	0.25158					9	0.263118		10	0.905572		12	0.910643
5	0.975672		0.954793			8	0.91					4		0.804095														20	0.589054					9	0.160621		10	0.714973		12	0.805289
5	0.564644		0.956319			8	0.71					4		1.25329														20	0.144202					9	0.0262517		10	1.20818		12	0.971449
5	1.035		0.956955			8	0.71					4		0.627084														20	0.425268					9	0.0293933		10	1.01982		12	0.646835
7	0.68102		0.96522			8	0.75					4		0.396537														20	0.091802					9	0.164161		10	1.12063		12	0.887624
7	0.980033		0.971378			8	0.85					4		0.85355														20	0.172777					9	0.174438		10	0.956779		12	0.5486
7	0.657224		0.975672			8	0.69					5		0.99081														20	0.278164					9	0.0274716		10	0.907987		12	0.528131
7	0.694495		0.980033			8	0.82					5		1.00797														20	0.429705					9	0.0896002		10	1.06315		12	0.571318
7	0.641855		0.985638			8	0.33					5		0.635807														20	0.393479					9	0.371117		10	0.807592		12	0.690323
7	0.544048		0.992258			8	0.96					5		0.855851														20	0.076734					9	0.0310309		10	1.09545		12	0.634516
7	0.899914		0.999722			8	1.04					5		0.617174														20	0.013325					9	0.0297442		10	0.873032		12	0.846986
7	0.67572		1.00309			8	1.07					5		1.05162														20	0.53746					9	0.0376314		10	0.481061		12	0.780623
7	0.905041		1.00867			8	0.84					5		0.966327														20	0.357773					9	0.0473902		10	0.811805		12	0.574856
7	0.822246		1.01654			8	0.91					5		0.966794														20	0.537721					9	0.049128		10	0.950734		12	0.550849
7	0.842239		1.02293			8	0.79					5		0.765224														20	0.596211					10	0.217981		10	1.27959		12	0.502605
7	0.63682		1.02848			8	1.04					5		0.920953														20	0.664942					10	0.331016		10	1.20056		12	0.66083
7	0.954793		1.0322			8	1.1					5		0.670202														20	0.769587					10	0.0522909		10	0.479297		12	0.546523
7	0.711905		1.035			8	0.75					5		0.800272														20	0.410747					10	0.0965679		10	0.408857		12	0.724486
7	0.834992		1.03796			8	0.8					5		0.975797														20	0.483225					10	0.453271		10	0.285479		12	0.795634
7	0.881007		1.0482			8	0.89					5		0.861367														20	0.211489					10	0.0222628		10	0.497674		12	0.823194
7	0.493832		1.05606			8	0.37					5		0.999252														20	0.342172					10	0.13635		10	0.761693		12	0.678678
7	0.93109		1.05907			8	0.43					5		0.879025														20	0.983978					10	0.143618		10	0.724101		12	0.818438
7	0.798357		1.0599			8	0.65					5		0.89496														20	0.474884					10	0.111391		10	0.52398		12	0.901218
7	1.18984		1.06064			8	0.46					5		0.887507														20	0.259062					10	0.102554		10	0.534975		12	0.73215
7	0.899861		1.06107			8	0.67					5		0.788518														20	0.608599					10	0.0119538		10	0.444411		12	0.685625
7	0.92853		1.06152			8	0.79					5		1.00597														20	0.394039					10	0.102688		10	0.612934		12	0.688619
7	0.741219		1.07514			8	0.82					5		0.938584														20	0.039662					10	0.095669		10	0.938369		12	0.500041
7	0.761487		1.07628			8	0.74					5		0.903322														20	0.016994					10	0.0127189		10	0.588803		12	0.480231
7	0.834228		1.08417			8	0.83					5		1.04922														20	0.367364					10	0.0871579		10	0.938574		12	0.752504
7	0.393059		1.08776			8	0.87					5		0.490296														20	0.771331					10	0.181851		10	0.736569		12	0.818467
7	0.242011		1.09007			8	0.8					5		0.642593														20	0.633973					10	0.418251		10	0.573526		12	0.674209
7	0.429842		1.11202			8	0.79					5		0.830232														20	0.354872					10	0.0745346		10	0.862225		12	1.02506
7	0.450631		1.14722			8	0.93					5		0.943954														20	0.159349					10	0.0283832		10	0.68132		12	0.95585
7	0.488384		1.18984			8	0.99					5		0.776631														20	0.715391					10	0.0337194		12	0.728349		12	0.902091
8	0.688887		1.19126			8	0.84					5		0.737094														20	0.256694					10	0.114719		12	0.556657		12	0.711881
8	0.390277		1.19147			8	0.91					5		0.725059														20	0.348899					10	0.221653		12	0.640371		12	0.888756
8	0.723877		1.26486			8	1.06					5		0.713879														20	0.536966					10	0.0144594		12	0.478236		12	0.80059
8	0.725922		1.33472			8	0.95					5		0.935552														20	0.156239					10	0.0534576		12	0.568594		12	0.674782
8	0.637264		1.38257			8	0.9					5		0.803946														20	0.284033					10	0.0136178		12	0.663782		12	0.682087
8	0.218274		2	1.18568		8	0.87					5		0.90789																				10	0.128681		12	0.585309		12	0.681328
8	0.340263		2	0.860255		8	0.82					5		0.613194																				10	0.0107298		12	0.434307		12	0.806807
8	0.241429		2	0.264404		8	0.9					5		0.685883																				10	0.0144785		12	0.588855		12	0.83219
8	0.678186		2	0.651638		8	0.9					5		0.737174																				10	0.025782		12	1.01963		12	0.544501
8	0.394156		2	0.798308		8	0.88					5		0.794876																				10	0.024252		12	0.425452		12	0.992776
8	0.731571		2	1.51749		8	0.89					5		0.751973																				10	0.0354981		12	0.683615		12	0.87792
8	0.725745		2	1.03705		10	0.74					5		0.542509																				10	0.0944449		12	0.888582		12	1.05907
8	0.623103		2	1.19883		10	0.78					5		0.543911																				10	0.105519		12	0.390412		12	0.705175
8	0.226966		2	1.17569		10	0.71					5		0.192822																				10	0.076715		12	0.826962		12	0.967681
8	0.331691		2	1.14146		10	0.54					5		0.328115																				10	0.0054892		12	0.902403		12	0.59808
8	0.226812		2	0.989026		10	1.02					5		0.219897																				10	0.623704		12	0.565597		12	0.575765
8	0.763139		2	0.997956		10	0.54					5		0.436																				10	0.84748		12	0.549858		12	0.622847
8	0.455824		2	1.10503		10	0.71					5		0.470488																				10	0.475725		12	0.73114		12	0.752586
8	1.33472		2	1.09512		10	0.91					5		0.639641																				10	0.759251		12	0.566453		12	0.691745
8	0.779945		2	1.26968		10	1.06					5		0.362229																				10	0.135119		12	0.790894		12	0.923379
8	0.502765		2	1.35712		10	0.95					5		0.546356																				10	0.0237452		12	0.727252		12	0.851029
8	0.451328		2	1.04648		10	0.9					5		0.903861																				10	0.0473233		12	0.837563		12	0.626704
8	0.380514		2	0.78372		10	0.47					5		0.803289																				10	0.170127		12	0.489847		12	0.600532
8	0.932087		2	1.40935		10	0.92					5		0.550914																				10	0.0595552		12	0.849295		12	0.547937
8	0.58257		2	1.35649		10	0.97					5		0.433406																				10	0.0691469		12	0.530676		12	0.720432
8	0.49959		2	0.709672		10	1.2					5		0.85279																				10	0.027622		12	0.460458		12	0.595816
8	0.805211		2	1.02382		10	0.73					5		0.851034																				10	0.375529		12	0.770154		12	0.78983
8	0.472112		2	0.845105		10	0.74					5		0.757773																				10	0.294284		12	0.945819		12	0.867395
8	0.467645		2	0.548654		10	1.02					5		0.588747																				10	0.233709		12	0.706855		12	0.89744
8	0.32076		2	1.10543		10	0.85					5		0.703316																				10	0.244387		12	0.540301		12	0.73989
8	0.352576		4	0.983828		10	0.89					5		0.70609																				10	0.352903		12	0.523021		12	0.892256
8	0.539364		4	0.889774		10	0.75					5		0.709545																				10	0.235881		12	1.01888		12	0.982501
8	0.274508		4	0.761305		10	0.89					5		1.17586																				10	0.0307134		12	0.762207		12	0.798184
8	0.216737		4	0.843138		10	0.87					5		0.998973																				10	0.00471228		12	0.789729		12	0.747463
8	0.331921		4	0.579316		10	0.88					5		0.992469																				10	0.0838853		12	0.632424		12	0.750727
8	0.198595		4	0.859874		10	0.87					5		0.955706																				10	0.0487604		12	0.89992		12	0.545142
8	0.169724		4	0.990671		10	0.8					5		0.932751																				10	0.206739		12	1.18196		12	0.523545
8	0.270443		4	1.01796		10	0.92					5		0.910623																				10	0.138678		12	0.840303		12	0.820375
8	0.677846		4	0.922945		10	0.81					5		0.979852																				10	0.138411		12	0.986545		12	0.892287
8	0.328732		4	0.49654		10	0.87					5		0.657232																				10	0.0288251		12	0.745834		12	0.735017
8	0.323977		4	0.966511		10	1.1					5		0.593391																				10	0.0290423		12	1.06832		12	1.11752
8	0.257947		4	1.24017		10	0.78					5		1.04169																				10	0.059338		12	1.33025		12	1.04206
8	0.465031		4	0.823171		10	0.99					5		0.981245																				10	0.244621		12	0.527953		12	0.983454
8	0.406469		4	0.837941		10	1.05					5		0.76029																				10	0.0631813		12	0.54073		12	0.776088
8	0.337049		4	0.614353		10	0.96					5		0.845983																				10	0.0340721		12	0.709715		12	0.968915
9	0.3032		4	0.952745		10	0.88					5		0.747615																				10	0.00511333		12	0.71684		12	0.872798
9	0.298642		4	0.881527		10	0.84					5		0.697639																				10	0.0316324		12	0.698617		12	0.735642
9	0.569129		4	0.803024		10	0.82					5		0.43301																							12	0.708756		12	0.743606
9	0.574959		4	1.05129		10	0.71					5		1.02147																							12	0.969641		12	0.742779
9	0.790434		4	0.842978		10	0.7					5		0.386645																							12	1.0885		12	0.879575
9	0.698258		4	0.767485		10	0.92					5		0.754991																							12	0.905777		12	0.907247
9	0.654879		4	0.984049		10	1.05					5		0.400904																							12	0.926277		14	0.583336
9	0.045436		4	1.28138		10	0.74					5		0.67431																							12	0.523637		14	0.676056
9	0.114587		6	0.524032		10	0.8					5		1.16407																							12	0.785259		14	0.645345
9	0.2961		6	0.305802		10	0.88					5		0.840775																							12	0.938917		14	0.657593
9	0.274665		6	0.390044		10	0.77					5		1.02048																							12	0.660854		14	0.683505
9	0.213629		6	0.852188		10	0.88					5		0.52877																							12	1.15726		14	0.816662
9	0.219517		6	0.835172		10	0.92					5		0.709262																							12	0.999784		14	0.884043
9	0.582596		6	0.93336		10	0.7					5		0.939783																							12	0.434906		14	0.787011
9	0.168964		6	1.14744		10	0.93					5		0.529273																							12	0.527868		14	0.612715
10	0.470908		6	1.16455		10	0.95					5		0.606023																							12	0.932563		14	0.677174
10	0.554035		6	0.985936		10	0.84					7		0.623914																							12	0.605792		14	0.613703
10	0.783372		6	1.21446		10	0.93					7		0.525872																							12	0.661385		14	0.764422
10	0.898594		6	0.742662		10	0.98					7		0.570662																							12	0.796563		14	0.493538
10	0.634434		6	0.515684		10	0.68					7		0.0488851																							12	1.06365		14	0.891735
10	0.428663		6	0.416151		10	0.9					7		0.130084																							12	0.960513		14	0.677274
10	0.384038		6	0.476733		10	0.95					7		0.19286																							12	1.10744		14	0.853819
10	0.461042		6	0.686454		10	0.93					8		0.68054																							14	0.362616		14	0.77273
10	0.285681		6	0.603016		10	0.76					8		0.442865																							14	0.251226		14	0.904598
10	0.063612		6	0.87645		10	0.93					8		0.608492																							14	0.086454		14	1.01696
10	0.31694		8	0.313367		10	0.69					8		0.79127																							14	0.672448		14	0.860408
10	0.312811		8	0.0872115		10	1.02					8		0.435118																							14	0.860564		14	0.589266
10	0.454293		8	0.338552		10	1.03					8		0.437963																							14	0.611102		14	0.504023
10	0.780892		8	0.683023		10	0.93					8		0.457745																							14	0.965103		14	0.77475
10	0.919607		8	0.500051		10	0.63					8		0.547611																							14	0.750544		14	0.581431
10	0.639758		8	1.28678		10	0.95					8		0.557068																							14	0.541295		14	0.787269
10	0.428559		8	0.619511		10	0.84					8		0.407643																							14	0.486902		14	0.732164
10	0.387571		8	0.615016		10	0.62					8		0.406868																							14	0.589916		14	0.383013
10	0.455309		8	0.852249		10	0.8					8		0.709218																							14	0.951076		14	0.453531
10	0.234374		8	0.791104		10	0.74					8		0.846074																							14	0.788719		14	0.635949
10	0.069191		8	0.83156		10	0.87					8		0.882004																							14	0.682621		14	0.737032
10	0.344822		8	0.324866		10	0.82					8		0.280043																							14	0.468319		14	0.703551
10	0.308606		8	0.193166		10	0.9					8		0.82115																							14	0.306133		14	0.716903
10	0.777603		8	0.425562		10	0.82					8		0.661106																							14	0.331651		14	0.745152
10	0.217412		8	0.310598		10	0.8					8		0.683773																							14	0.783701		14	0.890319
10	0.579884		8	0.166637		10	0.98					8		0.448596																							14	0.382568		14	0.963777
10	0.354041		8	0.163607		10	0.85					8		0.886666																							14	0.370031		14	0.857994
10	0.170729		8	0.767525		10	1.03					8		0.727223																							14	0.674726		14	0.667978
10	0.354989		10	0.137138		10	0.99					8		0.743746																							14	0.348076		14	0.73825
10	0.467631		10	0.0152309		12	0.93					8		0.49628																							14	0.820694		14	0.669055
10	0.510363		10	0.0888771		12	0.87					8		0.298155																							14	0.367086		14	0.833367
10	0.688389		10	0.367629		12	1.15					8		0.0914956																							14	0.375255		14	0.538052
10	0.66025		10	0.886062		12	1.06					8		0.284585																							14	0.672243		14	0.972163
10	0.61002		10	0.980417		12	1.13					8		0.248801																							14	0.66928		14	0.738359
10	0.581824		10	0.915841		12	1.1					8		0.251032																							14	0.940629		14	0.930827
10	0.466122		10	0.2153		12	0.93					8		0.474521																							14	0.875498		14	0.842425
10	0.738936		10	0.400077		12	1.03					8		0.336757																							14	0.73001		14	0.986186
10	0.79168		10	0.336766		12	1					8		0.474188																							14	0.927031		14	1.10868
10	0.048952		10	0.359843		12	1.06					8		0.471222																							14	0.413087		14	0.938011
10	0.324882		10	0.696187		12	1.05					8		0.418002																							14	0.144341		14	0.642414
10	0.239116		10	0.474747		12	0.99					8		0.48546																							14	0.403394		14	0.549483
12	0.669904		10	0.760502		12	1.13					8		0.463207																							14	0.27796		14	0.844627
12	0.595508		10	0.369575		12	0.7					8		0.434502																							14	0.764879		14	0.633872
12	0.306419		10	0.272752		12	0.99					8		0.45043																							14	0.523089		14	0.858275
12	0.063902		10	0.486887		12	0.93					8		0.0995005																							14	0.407778		14	0.7982
12	0.190964		10	0.149399		12	0.92					8		0.133485																							14	1.004		14	0.417558
12	0.118556		10	0.156884		12	0.62					8		0.500504																							14	0.993772		14	0.494436
12	0.102087		10	0.486265		12	0.98					8		0.31357																							14	0.778614		16	0.730488
12	0.252229		10	0.121606		12	0.82					8		0.339634																							14	0.756419		16	0.626423
12	0.55311		10	0.339154		12	0.7					8		0.561985																							14	0.505997		16	0.530523
12	0.31955		10	0.0520741		12	0.91					8		0.713814																							14	0.42809		16	0.637668
12	0.215555		10	0.465536		12	0.71					8		0.678851																							14	0.59836		16	0.738997
12	0.624816		12	0.0304418		12	0.84					8		0.817816																							14	1.13284		16	0.77369
12	0.370467		12	0.0133446		12	0.93					8		0.81073																							14	0.529238		16	0.918249
12	0.335462		12	0.166416		12	0.83					8		0.485076																							14	0.89694		16	0.86969
12	0.471706		12	0.1555		12	0.69					8		0.63917																							14	0.198272		16	0.723598
12	0.341842		12	0.223728		12	0.94					8		0.80485																							14	0.351655		16	0.723956
12	0.247576		12	0.292397		12	0.62					8		0.783812																							14	0.25806		16	0.743366
12	0.127603		12	0.0796462		12	0.96					8		0.403115																							14	0.647769		16	0.602559
12	0.1711		12	0.239099		12	1.06					8		0.300158																							14	0.562925		16	0.909554
12	0.098036		12	0.357575		12	0.72					8		0.354794																							14	0.465733		16	0.849479
15	0.382714		12	0.507316		12	0.69					8		0.558922																							14	1.27381		16	0.97884
15	0.231228		12	0.738067		12	0.65					8		0.432662																							14	0.475136		16	1.05036
15	0.191016		12	0.903681		12	0.64					8		1.04458																							14	0.767876		16	0.720905
15	0.069311		12	0.776616		12	0.76					8		1.00408																							14	0.943387		16	1.04901
15	0.373567		12	0.930751		12	0.82					8		0.89879																							16	0.207845		16	0.710721
15	0.096556		12	0.980076		12	0.77					8		1.08009																							16	0.230281		16	0.93773
15	0.383186		12	0.917587		12	0.76					9		0.125145																							16	0.536842		16	0.871237
15	0.229268		12	0.990551		12	0.72					9		0.34923																							16	0.494677		16	0.915298
15	0.170598		12	0.831499		12	0.65					9		0.527001																							16	0.403257		16	0.993866
15	0.07575		12	1.08424		12	0.44					9		0.352645																							16	1.16098		16	0.697156
15	0.09324		12	0.282725		12	0.36					9		0.172152																							16	0.29358		16	0.513248
15	0.140881		12	0.1617		12	0.42					9		0.113389																							16	0.145471		16	0.697256
15	0.051164		12	0.139667		12	0.72					9		0.167077																							16	0.454413		16	0.90646
15	0.022178		12	0.181868		12	0.57					10		0.440181																							16	0.39036		16	0.798857
15	0.032031		12	0.124015		12	0.79					10		0.191099																							16	0.404798		16	0.91855
15	0.255648		12	0.245581		12	0.77					10		0.159483																							16	0.517883		16	0.992677
15	0.010371		14	0.041599		12	0.78					10		0.248307																							16	0.625282		16	0.800304
15	0.098852		14	0.0396927		12	0.83					10		0.537032																							16	0.165132		16	0.796373
15	0.039271		14	0.0413181		12	0.72					10		0.378725																							16	0.335916		16	0.682922
15	0.065715		14	0.120744		12	0.85					10		0.103076																							16	0.77673		16	0.578373
15	0.073773		14	0.269461		12	0.68					10		0.21446																							16	0.929943		16	0.695181
15	0.01264		14	0.0150904		12	0.76					10		0.462433																							16	0.681268		16	0.805649
15	0.012798		14	0.267875		12	0.64					10		0.803037																							16	0.563576		16	0.843471
15	0.040937		14	1.49841		12	0.76					10		0.451013																							16	0.625402		16	1.00107
15	0.074091		14	0.050268		12	0.71					10		0.485047																							16	0.861489		16	0.94813
15	0.095555		14	0.0413984		12	0.87					10		0.576128																							16	1.01105		16	0.788862
15	0.357509		14	0.0810309		12	0.69					10		0.382598																							16	0.640987		16	0.789252
15	0.123988		14	0.0153513		12	0.85					10		0.587468																							16	0.557873		16	0.810412
15	0.218509		14	0.102643		12	0.88					10		0.750357																							16	0.653181		16	0.656906
15	0.197549		14	0.00862884		12	0.72					10		0.68814																							16	0.584744		16	0.99159
15	0.362994		14	0.0950778		12	0.85					10		0.581124																							16	0.350764		16	0.926096
15	0.18634		14	0.0307628		12	0.56					10		0.129162																							16	0.462137		16	1.06712
15	0.699066		14	0.0495456		12	0.86					10		0.240346																							16	1.19531		16	1.1451
15	0.593439		14	0.073887		12	0.71					10		0.180106																							16	0.456793		16	0.785926
15	0.053641		14	0.816309		12	0.7					10		0.461445																							16	0.596476		16	1.14363
15	0.401729		14	0.0106958		12	0.68					10		0.219068																							16	0.342167		16	0.774823
15	0.255977		16	0.0807298		12	0.86					10		0.36251																							16	0.457633		16	1.02231
15	0.280087		16	0		12	0.53					10		0.331014																							16	0.282071		16	0.949817
15	0.079491		16	0.00246825		12	0.79					10		0.132649																							16	0.396954		16	0.997852
15	0.050786		16	0.16764		12	0.74					10		0.137871																							16	0.555818		16	1.08351
22	0.080927		16	0.0463349		12	0.72					10		0.344624																							16	0.492159		16	0.760034
22	0.118155		16	0.0886965		12	0.8					10		0.115111																							16	0.319355		16	0.55954
22	0.203545		16	0.00038127		12	0.74					10		0.0605874																							16	0.403993		16	0.760144
22	0.228218		16	0.0366626		12	0.93					10		0.233614																							16	0.261999		16	0.988217
22	0.076399		16	0.0561477		12	0.66					10		0.205538																							16	0.380342		16	0.870909
22	0.00885		16	0.0378666		12	0.55					10		0.229754																							16	0.454533		16	1.0014
22	0.046271		16	0.0846831		12	0.71					10		0.160525																							16	0.23398		16	1.08221
22	0.045319		16	0.00776596		12	0.61					10		0.23861																							16	0.711051		16	0.872486
22	0.004953		16	0.0155921		12	0.76					10		0.0739845																							16	0.203649		18	0.576346
22	0.134788		16	0.0205086		12	0.8					10		0.266339																							16	0.470477		18	0.761772
22	0.151781		16	0.0115185		12	0.73					10		0.570946																							16	0.44674		18	0.727065
22	0.079505		16	0.286156		12	0.75					10		0.671043																							16	0.781354		18	0.246218
22	0.12246		16	0.155179		12	0.57					10		0.4171																							16	0.45938		18	0.457312
22	0.195496		16	0.265808		12	0.49					10		0.474548																							16	0.613225		18	0.697027
22	0.243428		16	0.247307		12	0.93					10		0.334393																							16	0.576044		18	0.563598
22	0.068908		16	0.566935		12	0.71					10		0.192314																							16	0.310946		18	0.561907
22	0.009517		16	0.307046		12	0.68					10		0.0821323																							16	0.527474		18	0.583909
22	0.047778		16	0.00624086		12	0.81					10		0.175725																							16	0.824992		18	0.887466
22	0.042646		16	0.00096322		12	0.81					10		0.105841																							16	0.683769		18	0.509725
22	0.003717		16	0.00162543		12	0.54					10		0.131927																							16	0.603001		18	0.689378
22	0.130511		16	0.0314652		14	0.46					10		0.259884																							16	0.771798		18	0.622914
22	0.150419		16	0.0196858		14	0.57					10		0.607725																							16	0.426805		18	0.683347
22	0.040377		16	0.0190236		14	0.52					10		0.452671																							16	0.174654		18	0.879359
22	0.05194		16	0.026629		14	0.45					10		0.166449																							16	0.253572		18	0.438605
22	0.002155		18	0.0132041		14	0.44					10		0.0493019																							16	0.576181		18	0.743781
22	0.005544		18	0.203841		14	0.64					10		0.167445																							16	0.48959		18	0.340957
22	0.005085		18	0.028435		14	0.67					10		0.404266																							16	0.934755		18	0.561234
22	0.17883		18	0.145948		14	0.56					10		0.127757																							18	0.227592		18	0.443031
22	0.357962		18	0.00461543		14	0.78					10		0.219051																							18	0.330281		18	0.692973
22	0.03996		18	0.0790442		14	0.61					10		0.0787411																							18	0.220998		18	0.653482
22	0.214122		18	0.0149299		14	0.78					10		0.322025																							18	0.2428		18	0.810345
22	0.054956		18	0.316076		14	0.49					10		0.421917																							18	0.123361		18	0.765897
22	0.003117		18	0.215239		14	0.74					10		0.468902																							18	0.715332		18	0.902965
22	0.022465		18	0.37999		14	0.73					10		0.550254																							18	0.438931		18	0.781812
22	0.026214		18	0.0306023		14	0.72					10		0.561172																							18	0.667773		18	0.921859
22	0.012626		18	0.0858068		14	0.57					10		0.451174																							18	0.41927		18	1.09852
22	0.021101		18	0.00921079		14	0.76					10		0.560591																							18	0.650955		18	0.853447
22	0.269883		18	0.0733251		14	0.78					10		0.534863																							18	0.52648		18	0.628328
22	0.228745		18	0.0331107		14	0.8					10		0.654517																							18	0.641878		18	0.830479
22	0.002715		18	0.117352		14	0.84					10		0.309654																							18	0.553643		18	0.792641
22	0.04088		18	0.00186624		14	0.73					10		0.349988																							18	0.218207		18	0.268425
22	0.092288		18	0.00616059		14	0.66					10		0.378475																							18	0.249788		18	0.498559
22	0.062627		18	0.00597999		14	0.84					10		0.570697																							18	0.266691		18	0.759894
22	0.018256		18	0.00694321		14	0.77					10		0.40008																							18	0.452597		18	0.61443
22	0.154929		18	0.0138061		14	0.53					10		0.395899																							18	0.239049		18	0.612587
22	0.018946		18	0.0841212		14	0.72					10		0.479283																							18	0.343862		18	0.636574
22	0.037992		18	0.0552848		14	0.59					10		0.503748																							18	0.362307		18	0.96751
22	0.001049		18	0.00587965		14	0.73					10		0.558631																							18	0.643453		18	0.555698
22	0.000129		18	0.00112376		14	0.71					10		0.739107																							18	0.36599		18	0.751555
22	0.003864		18	0.0160938		14	0.67					10		0.669559																							18	0.508172		18	0.679096
22	0.002873		20	0.0354987		14	0.74					10		0.491944																							18	0.237165		18	0.744981
22	0.134906		20	0.0813318		14	0.82					10		0.560983																							18	0.500722		18	0.958671
22	0.04098		20	0.0319067		14	0.62					10		0.455283																							18	0.445199		18	0.478164
22	0.235826		20	0.0952785		14	0.65					12		1.04411																							18	0.096164		18	0.810865
22	0.012309		20	0.107941		14	0.66					12		0.881486																							18	0.323688		18	0.371709
22	0.088519		20	0.00090302		14	0.5					12		0.679873																							18	0.500466		18	0.611853
22	0.03584		20	0.540226		14	0.67					12		0.952765																							18	0.511837		18	0.48299
22	0.145386		20	0.00090302		14	0.48					12		0.70782																							18	0.394728		18	0.755475
22	0.090427		20	0.00610039		14	0.47					12		0.806415																							18	0.014472		18	0.712421
22	0.22744		20	0.00040134		14	0.65					12		0.423828																							18	0.428843		18	0.883433
22	0.214058		20	0.0320672		14	0.45					12		0.105425																							18	0.049718		18	0.834976
22	0.115018		20	0.117152		14	0.37					12		0.383394																							18	0.21264		18	0.984406
22	0.121325		20	0.0883754		14	0.54					12		0.227459																							18	0.346671		18	0.852325
22	0.238582		20	0.064014		14	0.76					12		0.210888																							18	0.148023		18	1.005
22	0.130361		20	0.11655		14	0.53					12		0.240779																							18	0.031821		18	1.1976
22	0.087526		20	0.114362		14	0.39					12		0.0151023																							18	0.177549		18	0.930421
22	0.108115		20	0.103466		14	0.71					12		0.0648309																							18	0.407298		20	0.802696
22	0.053647		20	0.220798		14	0.27					12		0.0658649																							18	0.105961		20	0.700336
22	0.186817		20	0.0537998		14	0.68					12		0.14773																							18	0.299385		20	0.59259
22	0.053497		20	0.0939139		14	0.61					12		0.147648																							18	0.601408		20	0.635003
22	0.052222		20	0.431322		14	0.61					12		0.371597																							18	0.122419		20	0.665127
22	0.051486		20	0.61335		14	0.45					15		0.274994																							18	0.279759		20	0.702083
22	0.214975		20	0.461061		14	0.48					15		0.270186																							18	0.510947		20	0.672418
						14	0.49					15		0.14845																							18	0.365698		20	0.616368
						14	0.84					15		0.476699																							18	0.757686		20	0.515139
						14	0.72					15		0.260529																							18	0.5067		20	0.618946
						14	0.52					15		0.356713																							18	0.161707		20	0.727609
						14	0.71					15		0.675785																							18	0.3142		20	0.737063
						14	0.55					15		0.192248																							18	0.520589		20	0.470734
						14	0.3					15		0.660945																							18	0.484315		20	0.556077
						14	1.04					15		0.161727																							18	0.282516		20	0.400403
						14	0.91					15		0.0531743																							18	0.370391		20	0.548128
						14	0.9					15		0.0705785																							18	0.475924		20	0.487049
						14	0.97					15		0.027048																							18	0.436567		20	0.693217
						14	0.93					15		0.135066																							18	0.276522		20	0.584726
						14	0.92					15		0.0213445																							18	0.390155		20	0.74242
						14	1					15		0.00300533																							18	0.496338		20	0.663423
						14	0.88					15		0.0124354																							18	0.515091		20	0.462813
						14	0.86					15		0.0569543																							18	0.330144		20	0.48364
						14	0.97					15		0.0301201																							18	0.499918		20	0.727895
						16	0.85					15		0.0486997																							18	0.01675		20	0.739885
						16	0.82					15		0.0333124																							18	0.325109		20	0.38297
						16	1.09					15		0.122471																							18	0.103409		20	0.679981
						16	0.77					15		0.0566605																							18	0.200344		20	0.468113
						16	0.7					15		0.087208																							18	0.27123		20	0.34471
						16	0.95					15		0.0710994																							18	0.248178		20	0.506802
						16	0.91					15		0.0954532																							18	0.470357		20	0.387267
						16	0.91					15		0.131306																							18	0.465819		20	0.875094
						16	0.59					15		0.0603852																							18	0.282139		20	0.763501
						16	0.64					15		0.10503																							18	0.109232		20	0.646037
						16	0.69					15		0.233359																							18	0.397023		20	0.692276
						16	0.8					15		0.0373469																							18	0.943524		20	0.725117
						16	0.53					15		0.00896625																							20	0.401784		20	0.765406
						16	0.75					15		0.0184182																							20	0.635421		20	0.733065
						16	0.8					15		0.220505																							20	0.066913		20	0.67196
						16	0.39					15		0.143132																							20	0.474211		20	0.561601
						16	0.5					15		0.331796																							20	0.287123		20	0.674771
						16	0.44					15		0.124111																							20	0.183577		20	0.793234
						16	0.5					15		0.178472																							20	0.674812		20	0.803541
						16	0.38					15		0.255264																							20	0.317676		20	0.513191
						16	0.69					15		0.215438																							20	0.325366		20	0.606232
						16	0.35					15		0.160555																							20	0.188955		20	0.436516
						16	0.41					15		0.0714787																							20	0.347938		20	0.597565
						16	0.53					15		0.224367																							20	0.322403		20	0.530978
						16	0.6					15		0.118478																							20	0.560545		20	0.75574
						16	0.77					15		0.684283																							20	0.483391		20	0.637464
						16	0.19					15		0.365565																							20	0.445233		20	0.809381
						16	0.51					15		0.337328																							20	0.254634		20	0.723259
						16	0.35					15		0.816974																							20	0.240043		20	0.504555
						16	0.59					15		0.928106																							20	0.545662		20	0.527261
						16	0.63					15		0.331394																							20	0.200772		20	0.793547
						16	0.58					15		0.280842																							20	0.294813		20	0.806617
						16	0.44					15		0.827117																							20	0.23559		20	0.417511
						16	0.64					15		0.587817																							20	0.505398		20	0.741311
						16	0.63					15		0.120179																							20	0.546244		20	0.510333
						16	0.35					15		0.139419																							20	0.668406		20	0.375801
						16	0.42					15		0.507328																							20	0.501596		20	0.552512
						16	0.47					15		0.334796																							20	0.239255		20	0.422196
						16	0.34					15		0.0103267																							20	0.37409
						16	0.63					15		0.101784																							20	0.428055
						16	0.56					15		0.0236466																							20	0.134031
						16	0.71					15		0.0374563																							20	0.224475
						16	0.54					15		0.0419462																							20	0.651571
						16	0.73					15		0.0939198																							20	0.047748
						16	0.61					15		0.0984233																							20	0.017863
						16	0.46					15		0.301841																							20	0.005617
						16	0.51					22		0.00734636																							20	0.473252
						16	0.54					22		0.111745																							20	0.571403
						16	0.55					22		0.0352492																							20	0.030536
						16	0.47					22		0.0449464																							20	0.0677
						16	0.47					22		0.0465225																							20	0.012605
						16	0.61					22		0.0867004																							20	0.008563
						16	0.53					22		0.00690558																							20	0.550629
						16	0.62					22		0.131326																							20	0.030365
						16	0.75					22		0.0209037																							20	0.322934
						16	0.84					22		0.421387																							20	0.478818
						16	0.77					22		0.00427425																							20	0.462342
						16	0.55					22		0.0121015																							20	0.305037
						16	0.62					22		0.00577023
						16	0.55					22		0.0608813
						16	0.65					22		0.339549
						16	0.67					22		0.0453337
						16	0.32					22		0.0457478
						16	0.65					22		0.0269545
						16	0.68					22		0.0217719
						16	0.45					22		0.00864199
						16	0.47					22		0.10886
						16	0.55					22		0.0168566
						16	0.52					22		0.00411396
						16	0.54					22		0.00076135
						16	0.51					22		0.0256054
						16	0.87					22		0.000908277
						18	0.34					22		0.0166161
						18	0.37					22		0.435826
						18	0.31					22		0.0210239
						18	0.6					22		0.00651823
						18	0.68					22		0.0453738
						18	0.42					22		0.634605
						18	0.47					22		0.024243
						18	0.55					22		0.0179785
						18	0.8					22		0.340243
						18	0.44					22		0.0693363
						18	0.51					22		0.014666
						18	0.54					22		0.0220669
						18	0.78					22		0.105067
						18	0.4					22		0.0229138
						18	0.73					22		0.0252549
						18	0.65					22		0.0143834
						18	0.62					22		0.0169363
						18	0.53					22		0.0541716
						18	0.66					22		0.175829
						18	0.68					22		0.105831
						18	0.73					22		0.0198624
						18	0.5					22		0.131458
						18	0.77					22		0.0229841
						18	0.51					22		0.0278336
						18	0.71					22		0.0273109
						18	0.48					22		0.040567
						18	0.6					22		0.228055
						18	0.41					22		0.0435435
						18	0.25					22		0.0315069
						18	0.4					22		0.0239424
						18	0.69					22		0.0204287
						18	0.21					22		0.00593841
						18	0.62					22		0.218686
						18	0.85					22		0.56486
						18	0.4					22		0.906207
						18	0.43					22		0.417389
						18	0.59					22		0.60421
						18	0.61					22		0.157929
						18	0.74					22		0.257633
						18	0.57					22		0.735225
						18	0.39					22		0.22045
						18	0.72					22		0.00980283
						18	0.46					22		0.0612992
						18	0.44					22		0.001071
						18	0.6					22		0.00362881
						18	0.55					22		0.015498
						18	0.61					22		0.0923205
						18	0.55					22		0.118844
						18	0.38					22		0.0386695
						18	0.6					22		0.198299
						18	0.5					22		0.00874843
						18	0.45					22		0.0355516
						18	0.41					22		0.00723821
						18	0.65					22		0.0618785
						18	0.69					22		0.0432251
						18	0.48					22		0.275283
						18	0.44
						18	0.31
						18	0.31
						18	0.69
						18	0.87
						18	0.91
						18	0.94
						18	1.01
						18	0.88
						18	0.74
						18	0.95
						18	0.92
						18	0.96
						18	0.81
						18	0.82
						18	1.07
						18	0.99
						18	0.93
						20	0.71
						20	0.52
						20	0.63
						20	0.62
						20	0.34
						20	0.37
						20	0.28
						20	0.28
						20	0.83
						20	0.17
						20	0.21
						20	0.49
						20	0.52
						20	0.27
						20	0.66
						20	0.25
						20	0.7
						20	0.58
						20	0.46
						20	0.35
						20	0.2
						20	0.35
