# Supplementary material for: ANTH domains within CALM, HIP1R, and Sla2 recognize ubiquitin internalization signals
Source: eLife. 2021 Nov 25;10:e72583. doi: 10.7554/eLife.72583 (PMC8648300; doi:10.7554/eLife.72583)
Supplement: Supplementary file 1. [file elife-72583-supp1.xlsx]

## Sheet: plasmids
	TABLE 3. PLASMIDS USED
Plasmids	Description	Source	Figure Used	DNA Sequence	/
					/
pET21a	T7 bacterial expression plasmid with C-terminal 6xHis tag	Novagen	Fig.1	tggcgaatgggacgcgccctgtagcggcgcattaagcgcggcgggtgtggtggttacgcgcagcgtgaccgctacacttgccagcgccctagcgcccgctcctttcgctttcttcccttcctttctcgccacgttcgccggctttccccgtcaagctctaaatcgggggctccctttagggttccgatttagtgctttacggcacctcgaccccaaaaaacttgattagggtgatggttcacgtagtgggccatcgccctgatagacggtttttcgccctttgacgttggagtccacgttctttaatagtggactcttgttccaaactggaacaacactcaaccctatctcggtctattcttttgatttataagggattttgccgatttcggcctattg…	/
5293	Ubiquitin in pET21a+STOP before 6xHis	Pashkova et al., 2013	Fig.1	ATGCAGATCTTCGTTAAAACCCTGACCGGTAAAACCATCACCCTGGAAGTTGAACCGTCTGACACCATCGAAAACGTTAAAGCTAAAATCCAGGACAAAGAAGGTATCCCGCCGGACCAGCAGCGTCTGATCTTCGCTGGTAAACAGCTGGAAGACGGTCGTACCCTGTCTGACTACAACATCCAGAAAGAATCTACCCTGCACCTGGTTCTGCGTCTGCGTGGTGGTtga	/
					/
5816	mHip1 ANTH (a.a1-309) in pET21a	This study	Fig.1	tggcgaatgggacgcgccctgtagcggcgcattaagcgcggcgggtgtggtggttacgcgcagcgtgaccgctacacttgccagcgccctagcgcccgctcctttcgctttcttcccttcctttctcgccacgttcgccggctttccccgtcaagctctaaatcgggggctccctttagggttccgatttagtgctttacggcacctcgaccccaaaaaacttgattagggtgatggttcacgtagtgggccatcgccctgatagacggtttttcgccctttgacgttggagtccacgttctttaatagtggactcttgttccaaactggaacaacactcaaccctatctcggtctattcttttgatttataagggattttgccgatttcggcctattg…	/
6034	D.m. AP180 ANTH (LAP) (a.a1-299) in pET21a	This study	Fig.1	tggcgaatgggacgcgccctgtagcggcgcattaagcgcggcgggtgtggtggttacgcgcagcgtgaccgctacacttgccagcgccctagcgcccgctcctttcgctttcttcccttcctttctcgccacgttcgccggctttccccgtcaagctctaaatcgggggctccctttagggttccgatttagtgctttacggcacctcgaccccaaaaaacttgattagggtgatggttcacgtagtgggccatcgccctgatagacggtttttcgccctttgacgttggagtccacgttctttaatagtggactcttgttccaaactggaacaacactcaaccctatctcggtctattcttttgatttataagggattttgccgatttcggcctattg…	/
5829	yeast Sla2 ANTH (a.a.1-273) in pET21a	This study	Fig.1	tggcgaatgggacgcgccctgtagcggcgcattaagcgcggcgggtgtggtggttacgcgcagcgtgaccgctacacttgccagcgccctagcgcccgctcctttcgctttcttcccttcctttctcgccacgttcgccggctttccccgtcaagctctaaatcgggggctccctttagggttccgatttagtgctttacggcacctcgaccccaaaaaacttgattagggtgatggttcacgtagtgggccatcgccctgatagacggtttttcgccctttgacgttggagtccacgttctttaatagtggactcttgttccaaactggaacaacactcaaccctatctcggtctattcttttgatttataagggattttgccgatttcggcctattg…	/
5832	rCALM ANTH (a.a1-281) in pET21a	This study	Fig. 1,2,3	tggcgaatgggacgcgccctgtagcggcgcattaagcgcggcgggtgtggtggttacgcgcagcgtgaccgctacacttgccagcgccctagcgcccgctcctttcgctttcttcccttcctttctcgccacgttcgccggctttccccgtcaagctctaaatcgggggctccctttagggttccgatttagtgctttacggcacctcgaccccaaaaaacttgattagggtgatggttcacgtagtgggccatcgccctgatagacggtttttcgccctttgacgttggagtccacgttctttaatagtggactcttgttccaaactggaacaacactcaaccctatctcggtctattcttttgatttataagggattttgccgatttcggcctattg…	/
6905	C.t. Sla2 ANTH (a.a.1-262) in pET21a	This study	Fig. S4	tggcgaatgggacgcgccctgtagcggcgcattaagcgcggcgggtgtggtggttacgcgcagcgtgaccgctacacttgccagcgccctagcgcccgctcctttcgctttcttcccttcctttctcgccacgttcgccggctttccccgtcaagctctaaatcgggggctccctttagggttccgatttagtgctttacggcacctcgaccccaaaaaacttgattagggtgatggttcacgtagtgggccatcgccctgatagacggtttttcgccctttgacgttggagtccacgttctttaatagtggactcttgttccaaactggaacaacactcaaccctatctcggtctattcttttgatttataagggattttgccgatttcggcctattg…	/
6943	yeast Sla2 ANTH (a.a.1-257) in pET21a	This study	Fig. S4	tggcgaatgggacgcgccctgtagcggcgcattaagcgcggcgggtgtggtggttacgcgcagcgtgaccgctacacttgccagcgccctagcgcccgctcctttcgctttcttcccttcctttctcgccacgttcgccggctttccccgtcaagctctaaatcgggggctccctttagggttccgatttagtgctttacggcacctcgaccccaaaaaacttgattagggtgatggttcacgtagtgggccatcgccctgatagacggtttttcgccctttgacgttggagtccacgttctttaatagtggactcttgttccaaactggaacaacactcaaccctatctcggtctattcttttgatttataagggattttgccgatttcggcctattg…	/
7019	D.m AP180 ANTH (LAP) F237A, D238A in pET21a	This study	Fig. S3	tggcgaatgggacgcgccctgtagcggcgcattaagcgcggcgggtgtggtggttacgcgcagcgtgaccgctacacttgccagcgccctagcgcccgctcctttcgctttcttcccttcctttctcgccacgttcgccggctttccccgtcaagctctaaatcgggggctccctttagggttccgatttagtgctttacggcacctcgaccccaaaaaacttgattagggtgatggttcacgtagtgggccatcgccctgatagacggtttttcgccctttgacgttggagtccacgttctttaatagtggactcttgttccaaactggaacaacactcaaccctatctcggtctattcttttgatttataagggattttgccgatttcggcctattg…	/
					/
6139	rCALM ANTH (a.a.1-281) no native Cys C27S,C48A,C230A in pET21a	This study	Fig. S2	tggcgaatgggacgcgccctgtagcggcgcattaagcgcggcgggtgtggtggttacgcgcagcgtgaccgctacacttgccagcgccctagcgcccgctcctttcgctttcttcccttcctttctcgccacgttcgccggctttccccgtcaagctctaaatcgggggctccctttagggttccgatttagtgctttacggcacctcgaccccaaaaaacttgattagggtgatggttcacgtagtgggccatcgccctgatagacggtttttcgccctttgacgttggagtccacgttctttaatagtggactcttgttccaaactggaacaacactcaaccctatctcggtctattcttttgatttataagggattttgccgatttcggcctattg…	/
6140	rCALM A204C in p6139	This study	Fig.S2	tggcgaatgggacgcgccctgtagcggcgcattaagcgcggcgggtgtggtggttacgcgcagcgtgaccgctacacttgccagcgccctagcgcccgctcctttcgctttcttcccttcctttctcgccacgttcgccggctttccccgtcaagctctaaatcgggggctccctttagggttccgatttagtgctttacggcacctcgaccccaaaaaacttgattagggtgatggttcacgtagtgggccatcgccctgatagacggtttttcgccctttgacgttggagtccacgttctttaatagtggactcttgttccaaactggaacaacactcaaccctatctcggtctattcttttgatttataagggattttgccgatttcggcctattg…	/
6141	rCALM A209C in p6139	This study	Fig. S2	tggcgaatgggacgcgccctgtagcggcgcattaagcgcggcgggtgtggtggttacgcgcagcgtgaccgctacacttgccagcgccctagcgcccgctcctttcgctttcttcccttcctttctcgccacgttcgccggctttccccgtcaagctctaaatcgggggctccctttagggttccgatttagtgctttacggcacctcgaccccaaaaaacttgattagggtgatggttcacgtagtgggccatcgccctgatagacggtttttcgccctttgacgttggagtccacgttctttaatagtggactcttgttccaaactggaacaacactcaaccctatctcggtctattcttttgatttataagggattttgccgatttcggcctattg…	/
6143	rCALM S268C in p6139	This study	Fig.S2	tggcgaatgggacgcgccctgtagcggcgcattaagcgcggcgggtgtggtggttacgcgcagcgtgaccgctacacttgccagcgccctagcgcccgctcctttcgctttcttcccttcctttctcgccacgttcgccggctttccccgtcaagctctaaatcgggggctccctttagggttccgatttagtgctttacggcacctcgaccccaaaaaacttgattagggtgatggttcacgtagtgggccatcgccctgatagacggtttttcgccctttgacgttggagtccacgttctttaatagtggactcttgttccaaactggaacaacactcaaccctatctcggtctattcttttgatttataagggattttgccgatttcggcctattg…	/
6144	rCALM A284C in p6139	This study	Fig. S2	tggcgaatgggacgcgccctgtagcggcgcattaagcgcggcgggtgtggtggttacgcgcagcgtgaccgctacacttgccagcgccctagcgcccgctcctttcgctttcttcccttcctttctcgccacgttcgccggctttccccgtcaagctctaaatcgggggctccctttagggttccgatttagtgctttacggcacctcgaccccaaaaaacttgattagggtgatggttcacgtagtgggccatcgccctgatagacggtttttcgccctttgacgttggagtccacgttctttaatagtggactcttgttccaaactggaacaacactcaaccctatctcggtctattcttttgatttataagggattttgccgatttcggcctattg…	/
6154	rCALM ANTH (a.a.1-281) D224R in pET21a	This study		tggcgaatgggacgcgccctgtagcggcgcattaagcgcggcgggtgtggtggttacgcgcagcgtgaccgctacacttgccagcgccctagcgcccgctcctttcgctttcttcccttcctttctcgccacgttcgccggctttccccgtcaagctctaaatcgggggctccctttagggttccgatttagtgctttacggcacctcgaccccaaaaaacttgattagggtgatggttcacgtagtgggccatcgccctgatagacggtttttcgccctttgacgttggagtccacgttctttaatagtggactcttgttccaaactggaacaacactcaaccctatctcggtctattcttttgatttataagggattttgccgatttcggcctattg…	/
6155	rCALM ANTH (a.a.1-281) L274A, D276A in pET21a	This study	Fig.3	tggcgaatgggacgcgccctgtagcggcgcattaagcgcggcgggtgtggtggttacgcgcagcgtgaccgctacacttgccagcgccctagcgcccgctcctttcgctttcttcccttcctttctcgccacgttcgccggctttccccgtcaagctctaaatcgggggctccctttagggttccgatttagtgctttacggcacctcgaccccaaaaaacttgattagggtgatggttcacgtagtgggccatcgccctgatagacggtttttcgccctttgacgttggagtccacgttctttaatagtggactcttgttccaaactggaacaacactcaaccctatctcggtctattcttttgatttataagggattttgccgatttcggcctattg…	/
6156	rCALM ANTH (a.a.1-281) F223S in pET21a	This study	Fig.3	tggcgaatgggacgcgccctgtagcggcgcattaagcgcggcgggtgtggtggttacgcgcagcgtgaccgctacacttgccagcgccctagcgcccgctcctttcgctttcttcccttcctttctcgccacgttcgccggctttccccgtcaagctctaaatcgggggctccctttagggttccgatttagtgctttacggcacctcgaccccaaaaaacttgattagggtgatggttcacgtagtgggccatcgccctgatagacggtttttcgccctttgacgttggagtccacgttctttaatagtggactcttgttccaaactggaacaacactcaaccctatctcggtctattcttttgatttataagggattttgccgatttcggcctattg…	/
6157	rCALM ANTH (a.a.1-281) F223A in pET21a	This study	Fig.3	tggcgaatgggacgcgccctgtagcggcgcattaagcgcggcgggtgtggtggttacgcgcagcgtgaccgctacacttgccagcgccctagcgcccgctcctttcgctttcttcccttcctttctcgccacgttcgccggctttccccgtcaagctctaaatcgggggctccctttagggttccgatttagtgctttacggcacctcgaccccaaaaaacttgattagggtgatggttcacgtagtgggccatcgccctgatagacggtttttcgccctttgacgttggagtccacgttctttaatagtggactcttgttccaaactggaacaacactcaaccctatctcggtctattcttttgatttataagggattttgccgatttcggcctattg…	/
6158	rCALM ANTH (a.a.1-281) F223S, D224R in pET21a	This study	Fig.3	tggcgaatgggacgcgccctgtagcggcgcattaagcgcggcgggtgtggtggttacgcgcagcgtgaccgctacacttgccagcgccctagcgcccgctcctttcgctttcttcccttcctttctcgccacgttcgccggctttccccgtcaagctctaaatcgggggctccctttagggttccgatttagtgctttacggcacctcgaccccaaaaaacttgattagggtgatggttcacgtagtgggccatcgccctgatagacggtttttcgccctttgacgttggagtccacgttctttaatagtggactcttgttccaaactggaacaacactcaaccctatctcggtctattcttttgatttataagggattttgccgatttcggcctattg…	/
6159	rCALM ANTH (a.a.1-281) F223I in pET21a	This study		tggcgaatgggacgcgccctgtagcggcgcattaagcgcggcgggtgtggtggttacgcgcagcgtgaccgctacacttgccagcgccctagcgcccgctcctttcgctttcttcccttcctttctcgccacgttcgccggctttccccgtcaagctctaaatcgggggctccctttagggttccgatttagtgctttacggcacctcgaccccaaaaaacttgattagggtgatggttcacgtagtgggccatcgccctgatagacggtttttcgccctttgacgttggagtccacgttctttaatagtggactcttgttccaaactggaacaacactcaaccctatctcggtctattcttttgatttataagggattttgccgatttcggcctattg…	/
7222	rCALM ANTH (a.a.1-281) L219S, M244K in pET21a	This study	Fig. S3	tggcgaatgggacgcgccctgtagcggcgcattaagcgcggcgggtgtggtggttacgcgcagcgtgaccgctacacttgccagcgccctagcgcccgctcctttcgctttcttcccttcctttctcgccacgttcgccggctttccccgtcaagctctaaatcgggggctccctttagggttccgatttagtgctttacggcacctcgaccccaaaaaacttgattagggtgatggttcacgtagtgggccatcgccctgatagacggtttttcgccctttgacgttggagtccacgttctttaatagtggactcttgttccaaactggaacaacactcaaccctatctcggtctattcttttgatttataagggattttgccgatttcggcctattg…	/
815	GST-Vamp7 cytosolic domain (a.a.1-188) in pGEX-4T-3	This study	Fig. 3	atggccattctttttgctgttgttgccaggggaaccactatccttgccaaacatgcttggtgtggaggaaacttcctggaggtgacagagcagattctggctaagataccttctgaaaataataaactaacttactcacatggcaattatttgtttcattacatctgccaagacaggattgtgtatctttgtatcactgatgatgattttgagcgttctcgagcgttcagttttttgaatgaagtaaagaagagattccagacaacttacggttcaagagcacaaactgcacttccttatgctatgaatagcgagttttcaagtgttttggctgcacaactgaagcatcactctgagaataagagcctagacaaagtgatggagactcaagcacaagtg…	/
6160	HA_rCALM ANTH (a.a.1-281) in pET21a	This study	Fig. 3	tggcgaatgggacgcgccctgtagcggcgcattaagcgcggcgggtgtggtggttacgcgcagcgtgaccgctacacttgccagcgccctagcgcccgctcctttcgctttcttcccttcctttctcgccacgttcgccggctttccccgtcaagctctaaatcgggggctccctttagggttccgatttagtgctttacggcacctcgaccccaaaaaacttgattagggtgatggttcacgtagtgggccatcgccctgatagacggtttttcgccctttgacgttggagtccacgttctttaatagtggactcttgttccaaactggaacaacactcaaccctatctcggtctattcttttgatttataagggattttgccgatttcggcctattg…	/
6235	HA_rCALM ANTH (a.a.1-281) F223S, D224R in pET21a	This study	Fig. 3	tggcgaatgggacgcgccctgtagcggcgcattaagcgcggcgggtgtggtggttacgcgcagcgtgaccgctacacttgccagcgccctagcgcccgctcctttcgctttcttcccttcctttctcgccacgttcgccggctttccccgtcaagctctaaatcgggggctccctttagggttccgatttagtgctttacggcacctcgaccccaaaaaacttgattagggtgatggttcacgtagtgggccatcgccctgatagacggtttttcgccctttgacgttggagtccacgttctttaatagtggactcttgttccaaactggaacaacactcaaccctatctcggtctattcttttgatttataagggattttgccgatttcggcctattg…	/
6234	HA_rCALM ANTH (a.a.1-281) F223A in pET21a	This study	Fig. 3	tggcgaatgggacgcgccctgtagcggcgcattaagcgcggcgggtgtggtggttacgcgcagcgtgaccgctacacttgccagcgccctagcgcccgctcctttcgctttcttcccttcctttctcgccacgttcgccggctttccccgtcaagctctaaatcgggggctccctttagggttccgatttagtgctttacggcacctcgaccccaaaaaacttgattagggtgatggttcacgtagtgggccatcgccctgatagacggtttttcgccctttgacgttggagtccacgttctttaatagtggactcttgttccaaactggaacaacactcaaccctatctcggtctattcttttgatttataagggattttgccgatttcggcctattg…	/
					/
622	GST in pGEX-3X	Hunter and Hunter, 1998	Fig. 1,3	agcttatcgactgcacggtgcaccaatgcttctggcgtcaggcagccatcggaagctgtggtatggctgtgcaggtcgtaaatcactgcataattcgtgtcgctcaaggcgcactcccgttctggataatgttttttgcgccgacatcataacggttctggcaaatattctgaaatgagctgttgacaattaatcatcggctcgtataatgtgtggaattgtgagcggataacaatttcacacaggaaacagtattcatgtcccctatactaggttattggaaaattaagggccttgtgcaacccactcgacttcttttggaatatcttgaagaaaaatatgaagagcatttgtatgagcgcgatgaaggtgataaatggcgaaacaaaaagtttgaat…	/
5811	pGEX-TEV; GST in pGEX-3X with TEV site	This study	Fig. 4; Table 2	agcttatcgactgcacggtgcaccaatgcttctggcgtcaggcagccatcggaagctgtggtatggctgtgcaggtcgtaaatcactgcataattcgtgtcgctcaaggcgcactcccgttctggataatgttttttgcgccgacatcataacggttctggcaaatattctgaaatgagctgttgacaattaatcatcggctcgtataatgtgtggaattgtgagcggataacaatttcacacaggaaacagtattcatgtcccctatactaggttattggaaaattaagggccttgtgcaacccactcgacttcttttggaatatcttgaagaaaaatatgaagagcatttgtatgagcgcgatgaaggtgataaatggcgaaacaaaaagtttgaat…	/
3998	GST-5xUb	Pashkova et al., 2010	Fig. 1,3	ATGTCCCCTATACTAGGTTATTGGAAAATTAAGGGCCTTGTGCAACCCACTCGACTTCTTTTGGAATATCTTGAAGAAAAATATGAAGAGCATTTGTATGAGCGCGATGAAGGTGATAAATGGCGAAACAAAAAGTTTGAATTGGGTTTGGAGTTTCCCAATCTTCCTTATTATATTGATGGTGATGTTAAATTAACACAGTCTATGGCCATCATACGTTATATAGCTGACAAGCACAACATGTTGGGTGGTTGTCCAAAAGAGCGTGCAGAGATTTCAATGCTTGAAGGAGCGGTTTTGGATATTAGATACGGTGTTTCGAGAATTGCATATAGTAAAGACTTTGAAACTCTCAAAGTTGATTTTCTTAGCAAGCTACCTGAAATGCTGAAAATGTTC…	/
3968	V5_5xUb in pET151/D	Pashkova et al., 2010	Fig. 3	CAAGGAGATGGCGCCCAACAGTCCCCCGGCCACGGGGCCTGCCACCATACCCACGCCGAAACAAGCGCTCATGAGCCCGAAGTGGCGAGCCCGATCTTCCCCATCGGTGATGTCGGCGATATAGGCGCCAGCAACCGCACCTGTGGCGCCGGTGATGCCGGCCACGATGCGTCCGGCGTAGAGGATCGAGATCTCGATCCCGCGAAATTAATACGACTCACTATAGGGGAATTGTGAGCGGATAACAATTCCCCTCTAGAAATAATTTTGTTTAACTTTAAGAAGGAGATATACATATGCATCATCACCATCACCATGGTAAGCCTATCCCTAACCCTCTCCTCGGTCTCGATTCTACGGAAAACCTGTATTTTCAGGGAATTGATCCCTTCACCagga…	/
2171	Ub-GST	Pashkova et al., 2010	Fig. 1	CTAGAATAATTTTGTTTACTTTAAGAAGGAGATATACATATGCAGATTTTCGTCAAGACTTTGACCGGTAAAACCATAACATTGGAAGTTGAATCTTCCGATACCATCGACAACGTTAAGTCGAAAATTCAAGACAAGGAAGGTATCCCTCCAGATCAACAAAGATTGATCTTTGCCGGTAAGCAGCTAGAAGACGGTAGAACGCTGTCTGATTACAACATTCAGAAGGAGTCCACCTTACATCTTGTGCTAAGGCTAAGAGGTGTCGTTGAGCTCCACGGTTCTGGTGCTTGGCTGTTGCCCGTCTCACTGGTGAAAAGAAAAACCACCCTGGCGCCCAATACGCAAACCGCCTCTCCCCGCGCGTTGGCCGATTCATTAATGCAGGGATCCGGCATC…	/
					/
6624	yeast Sla2 (a.a.1-273) L212A, D218A in pET21a	This study	Fig. 4	tggcgaatgggacgcgccctgtagcggcgcattaagcgcggcgggtgtggtggttacgcgcagcgtgaccgctacacttgccagcgccctagcgcccgctcctttcgctttcttcccttcctttctcgccacgttcgccggctttccccgtcaagctctaaatcgggggctccctttagggttccgatttagtgctttacggcacctcgaccccaaaaaacttgattagggtgatggttcacgtagtgggccatcgccctgatagacggtttttcgccctttgacgttggagtccacgttctttaatagtggactcttgttccaaactggaacaacactcaaccctatctcggtctattcttttgatttataagggattttgccgatttcggcctattg…	/
7025	yeast Sla2 (a.a.1-273) L212S D218R in pET21a	This study	Fig. 4	tggcgaatgggacgcgccctgtagcggcgcattaagcgcggcgggtgtggtggttacgcgcagcgtgaccgctacacttgccagcgccctagcgcccgctcctttcgctttcttcccttcctttctcgccacgttcgccggctttccccgtcaagctctaaatcgggggctccctttagggttccgatttagtgctttacggcacctcgaccccaaaaaacttgattagggtgatggttcacgtagtgggccatcgccctgatagacggtttttcgccctttgacgttggagtccacgttctttaatagtggactcttgttccaaactggaacaacactcaaccctatctcggtctattcttttgatttataagggattttgccgatttcggcctattg…	/
6815	yeast Sla2 (a.a.1-273) no native Cys C16S,C31S,C182A,C242A in pET21a	This study	Fig. 4	tggcgaatgggacgcgccctgtagcggcgcattaagcgcggcgggtgtggtggttacgcgcagcgtgaccgctacacttgccagcgccctagcgcccgctcctttcgctttcttcccttcctttctcgccacgttcgccggctttccccgtcaagctctaaatcgggggctccctttagggttccgatttagtgctttacggcacctcgaccccaaaaaacttgattagggtgatggttcacgtagtgggccatcgccctgatagacggtttttcgccctttgacgttggagtccacgttctttaatagtggactcttgttccaaactggaacaacactcaaccctatctcggtctattcttttgatttataagggattttgccgatttcggcctattg…	/
6867	yeast Sla2 (a.a.1-273) S203C in p6815	This study	Fig. 4	tggcgaatgggacgcgccctgtagcggcgcattaagcgcggcgggtgtggtggttacgcgcagcgtgaccgctacacttgccagcgccctagcgcccgctcctttcgctttcttcccttcctttctcgccacgttcgccggctttccccgtcaagctctaaatcgggggctccctttagggttccgatttagtgctttacggcacctcgaccccaaaaaacttgattagggtgatggttcacgtagtgggccatcgccctgatagacggtttttcgccctttgacgttggagtccacgttctttaatagtggactcttgttccaaactggaacaacactcaaccctatctcggtctattcttttgatttataagggattttgccgatttcggcctattg…	/
6868	yeast Sla2 (a.a.1-273) A215C in p6815	This study	Fig. 4	tggcgaatgggacgcgccctgtagcggcgcattaagcgcggcgggtgtggtggttacgcgcagcgtgaccgctacacttgccagcgccctagcgcccgctcctttcgctttcttcccttcctttctcgccacgttcgccggctttccccgtcaagctctaaatcgggggctccctttagggttccgatttagtgctttacggcacctcgaccccaaaaaacttgattagggtgatggttcacgtagtgggccatcgccctgatagacggtttttcgccctttgacgttggagtccacgttctttaatagtggactcttgttccaaactggaacaacactcaaccctatctcggtctattcttttgatttataagggattttgccgatttcggcctattg…	/
6870	yeast Sla2 (a.a.1-273) A233C in p6815	This study	Fig. 4	tggcgaatgggacgcgccctgtagcggcgcattaagcgcggcgggtgtggtggttacgcgcagcgtgaccgctacacttgccagcgccctagcgcccgctcctttcgctttcttcccttcctttctcgccacgttcgccggctttccccgtcaagctctaaatcgggggctccctttagggttccgatttagtgctttacggcacctcgaccccaaaaaacttgattagggtgatggttcacgtagtgggccatcgccctgatagacggtttttcgccctttgacgttggagtccacgttctttaatagtggactcttgttccaaactggaacaacactcaaccctatctcggtctattcttttgatttataagggattttgccgatttcggcctattg…	/
6871	yeast Sla2 (a.a.1-273) N268C in p6815	This study	Fig. 4	tggcgaatgggacgcgccctgtagcggcgcattaagcgcggcgggtgtggtggttacgcgcagcgtgaccgctacacttgccagcgccctagcgcccgctcctttcgctttcttcccttcctttctcgccacgttcgccggctttccccgtcaagctctaaatcgggggctccctttagggttccgatttagtgctttacggcacctcgaccccaaaaaacttgattagggtgatggttcacgtagtgggccatcgccctgatagacggtttttcgccctttgacgttggagtccacgttctttaatagtggactcttgttccaaactggaacaacactcaaccctatctcggtctattcttttgatttataagggattttgccgatttcggcctattg…	/
6902	yeast Sla2 (a.a.1-273) A30C in p6815	This study	Fig. 4	tggcgaatgggacgcgccctgtagcggcgcattaagcgcggcgggtgtggtggttacgcgcagcgtgaccgctacacttgccagcgccctagcgcccgctcctttcgctttcttcccttcctttctcgccacgttcgccggctttccccgtcaagctctaaatcgggggctccctttagggttccgatttagtgctttacggcacctcgaccccaaaaaacttgattagggtgatggttcacgtagtgggccatcgccctgatagacggtttttcgccctttgacgttggagtccacgttctttaatagtggactcttgttccaaactggaacaacactcaaccctatctcggtctattcttttgatttataagggattttgccgatttcggcctattg…	/
6903	yeast Sla2 (a.a.1-273) A54C in p6815	This study	Fig. 4	tggcgaatgggacgcgccctgtagcggcgcattaagcgcggcgggtgtggtggttacgcgcagcgtgaccgctacacttgccagcgccctagcgcccgctcctttcgctttcttcccttcctttctcgccacgttcgccggctttccccgtcaagctctaaatcgggggctccctttagggttccgatttagtgctttacggcacctcgaccccaaaaaacttgattagggtgatggttcacgtagtgggccatcgccctgatagacggtttttcgccctttgacgttggagtccacgttctttaatagtggactcttgttccaaactggaacaacactcaaccctatctcggtctattcttttgatttataagggattttgccgatttcggcctattg…	/
6904	yeast Sla2 (a.a.1-273) S77C in p6815	This study	Fig. 4	tggcgaatgggacgcgccctgtagcggcgcattaagcgcggcgggtgtggtggttacgcgcagcgtgaccgctacacttgccagcgccctagcgcccgctcctttcgctttcttcccttcctttctcgccacgttcgccggctttccccgtcaagctctaaatcgggggctccctttagggttccgatttagtgctttacggcacctcgaccccaaaaaacttgattagggtgatggttcacgtagtgggccatcgccctgatagacggtttttcgccctttgacgttggagtccacgttctttaatagtggactcttgttccaaactggaacaacactcaaccctatctcggtctattcttttgatttataagggattttgccgatttcggcctattg…	/
6865	yeast Sla2 (a.a.1-273) S161C in p6815	This study	Fig.4	tggcgaatgggacgcgccctgtagcggcgcattaagcgcggcgggtgtggtggttacgcgcagcgtgaccgctacacttgccagcgccctagcgcccgctcctttcgctttcttcccttcctttctcgccacgttcgccggctttccccgtcaagctctaaatcgggggctccctttagggttccgatttagtgctttacggcacctcgaccccaaaaaacttgattagggtgatggttcacgtagtgggccatcgccctgatagacggtttttcgccctttgacgttggagtccacgttctttaatagtggactcttgttccaaactggaacaacactcaaccctatctcggtctattcttttgatttataagggattttgccgatttcggcctattg…	/
6236	yeast Sla2 (a.a.1-273) in pGEX-TEV	This study	Fig. 4	agcttatcgactgcacggtgcaccaatgcttctggcgtcaggcagccatcggaagctgtggtatggctgtgcaggtcgtaaatcactgcataattcgtgtcgctcaaggcgcactcccgttctggataatgttttttgcgccgacatcataacggttctggcaaatattctgaaatgagctgttgacaattaatcatcggctcgtataatgtgtggaattgtgagcggataacaatttcacacaggaaacagtattcatgtcccctatactaggttattggaaaattaagggccttgtgcaacccactcgacttcttttggaatatcttgaagaaaaatatgaagagcatttgtatgagcgcgatgaaggtgataaatggcgaaacaaaaagtttgaat…	/
6247	yeast Sla2 (a.a.1-273) L212A, D218A in pGEX-TEV	This study	Fig. 4	agcttatcgactgcacggtgcaccaatgcttctggcgtcaggcagccatcggaagctgtggtatggctgtgcaggtcgtaaatcactgcataattcgtgtcgctcaaggcgcactcccgttctggataatgttttttgcgccgacatcataacggttctggcaaatattctgaaatgagctgttgacaattaatcatcggctcgtataatgtgtggaattgtgagcggataacaatttcacacaggaaacagtattcatgtcccctatactaggttattggaaaattaagggccttgtgcaacccactcgacttcttttggaatatcttgaagaaaaatatgaagagcatttgtatgagcgcgatgaaggtgataaatggcgaaacaaaaagtttgaat…	/
					/
					/
5327	pGBKT7 vector; Gal4 BD low copy TRP1	Clontech	Fig.S4	cggtgcgggcctcttcgctattacgccagatccttttgttgtttccgggtgtacaatatggacttcctcttttctggcaaccaaacccatacatcgggattcctataataccttcgttggtctccctaacatgtaggtggcggaggggagatatacaatagaacagataccagacaagacataatgggctaaacaagactacaccaattacactgcctcattgatggtggtacataacgaactaatactgtagccctagacttgatagccatcatcatatcgaagtttcactaccctttttccatttgccatctattgaagtaataataggcgcatgcaacttcttttctttttttttcttttctctctcccccgttgttgtctcaccatatccgcaat…	/
5808	pGADT7 vector with polylinker; Gal4 AD low copy LEU2	Peterson et al, 2018	Fig.S4	tgcatgcctgcaggtcgagatccgggatcgaagaaatgatggtaaatgaaataggaaatcaaggagcatgaaggcaaaagacaaatataagggtcgaacgaaaaataaagtgaaaagtgttgatatgatgtatttggctttgcggcgccgaaaaaacgagtttacgcaattgcacaatcatgctgactctgtggcggacccgcgctcttgccggcccggcgataacgctgggcgtgaggctgtgcccggcggagttttttgcgcctgcattttccaaggtttaccctgcgctaaggggcgagattggagaagcaataagaatgccggttggggttgcgatgatgacgaccacgacaactggtgtcattatttaagttgccgaaagaacctgagtgcatt…	/
6968	GAD_hHip1 ANTH (41-309) in p5808	This study	Fig.S4	tgcatgcctgcaggtcgagatccgggatcgaagaaatgatggtaaatgaaataggaaatcaaggagcatgaaggcaaaagacaaatataagggtcgaacgaaaaataaagtgaaaagtgttgatatgatgtatttggctttgcggcgccgaaaaaacgagtttacgcaattgcacaatcatgctgactctgtggcggacccgcgctcttgccggcccggcgataacgctgggcgtgaggctgtgcccggcggagttttttgcgcctgcattttccaaggtttaccctgcgctaaggggcgagattggagaagcaataagaatgccggttggggttgcgatgatgacgaccacgacaactggtgtcattatttaagttgccgaaagaacctgagtgcatt…	/
6969	GAD_hHip1R ANTH (32-300) in p5808	This study	Fig.S4	tgcatgcctgcaggtcgagatccgggatcgaagaaatgatggtaaatgaaataggaaatcaaggagcatgaaggcaaaagacaaatataagggtcgaacgaaaaataaagtgaaaagtgttgatatgatgtatttggctttgcggcgccgaaaaaacgagtttacgcaattgcacaatcatgctgactctgtggcggacccgcgctcttgccggcccggcgataacgctgggcgtgaggctgtgcccggcggagttttttgcgcctgcattttccaaggtttaccctgcgctaaggggcgagattggagaagcaataagaatgccggttggggttgcgatgatgacgaccacgacaactggtgtcattatttaagttgccgaaagaacctgagtgcatt…	/
7037	GAD_hHip1 ANTH L250S, D253R (41-309) in p5808	This study	Fig.S4	tgcatgcctgcaggtcgagatccgggatcgaagaaatgatggtaaatgaaataggaaatcaaggagcatgaaggcaaaagacaaatataagggtcgaacgaaaaataaagtgaaaagtgttgatatgatgtatttggctttgcggcgccgaaaaaacgagtttacgcaattgcacaatcatgctgactctgtggcggacccgcgctcttgccggcccggcgataacgctgggcgtgaggctgtgcccggcggagttttttgcgcctgcattttccaaggtttaccctgcgctaaggggcgagattggagaagcaataagaatgccggttggggttgcgatgatgacgaccacgacaactggtgtcattatttaagttgccgaaagaacctgagtgcatt…	/
7027	GAD_hHip1R ANTH L241S, D244R (32-300) in p5808	This study	Fig.S4	tgcatgcctgcaggtcgagatccgggatcgaagaaatgatggtaaatgaaataggaaatcaaggagcatgaaggcaaaagacaaatataagggtcgaacgaaaaataaagtgaaaagtgttgatatgatgtatttggctttgcggcgccgaaaaaacgagtttacgcaattgcacaatcatgctgactctgtggcggacccgcgctcttgccggcccggcgataacgctgggcgtgaggctgtgcccggcggagttttttgcgcctgcattttccaaggtttaccctgcgctaaggggcgagattggagaagcaataagaatgccggttggggttgcgatgatgacgaccacgacaactggtgtcattatttaagttgccgaaagaacctgagtgcatt…	/
5643	GBD_diUb with 3-residue spacer in p5327	Pashkova et al., 2016	Fig.S4	atgaagctactgtcttctatcgaacaagcatgcgatatttgccgacttaaaaagctcaagtgctccaaagaaaaaccgaagtgcgccaagtgtctgaagaacaactgggagtgtcgctactctcccaaaaccaaaaggtctccgctgactagggcacatctgacagaagtggaatcaaggctagaaagactggaacagctatttctactgatttttcctcgagaagaccttgacatgattttgaaaatggattctttacaggatataaaagcattgttaacaggattatttgtacaagataatgtgaataaagatgccgtcacagatagattggcttcagtggagactgatatgcctctaacattgagacagcatagaataagtgcgacatcatcatcg…	/
					/
6305	pRS306 with YAP1801 F213A, E214S	This study	Fig. 5	TATACAATCCGGATATATATGCTTACGTACATATCTTTGACAAAGCAAAGTTTCGAGTTGTAAATTCGGCGTTTATCTGCCCGTAGTAATTTCCTTTTTGCTTTCGTCGGCGCCGCTGAGAATATAGCTACACAATTGCGATATAGAGTCGCCATTCCGTATCCTGTAGTTGGCAATTCTACCCAATTGATAGCCAGCGGTCAGACAAAGAAACGAGTTGACAGAAGCCAACAAGATGTTTCTTGGCTTGATGACAAAGGACCAACGAGTCCAAATCAGCGCAGTAGATAGCAGCGACAAATTTTGAGCACCAGAAATTTTTTCCACCGGTCTCTTCATATCGCTGAATCCAGCGAAAACCAGACCCCATTTCAAAGTAGGAGCCCAGAAATGCACCGT…	/
6306	pRS306 with YAP1802 F207A, E208A	This study	Fig. 5	GCGACGGCTGCAGGAGTCTCCCCTTTTATTATGTAGTGAATAACCTGTTTAAAAGAATCACCGTTCCGTATCCTAAAGTTAGCAATTCTTGTTAGATGGTAGCCTGCAGTGCAACCCAGGAAAAAATTGACGGAAGCTAACAGATAGTTCTTGGGCTTGATGACAAACGACCAACGCGTCCAAATCAGTGCCGTCGCTAATAAAGATAAATTTTGTGCTCCTGATACCTTCTCAACAGGCCTCTTAATATCATTTAGCCCTGCGAAGACCAGCCCCCACTTCAAAGTTGGGGCCCAGAAGTGTACTGTTTTAGGGCCTGTTTCACTATTCCAAAATCTTCTAAAGGCAAAATTAAAAGCTGATGCTGACATTAAAAATATAGGTTTGTGTTTCTATGTG…	/
6307	pRS306 with Sla2 L212A, D218A	This study	Fig. 5	ACCATTACATGCAAAGTCCTTCTTTAGGACCTTAAGAATTCTCTTTAAATCATATTCCTCTGGGACACCTTGCACCGTAGTTAAAGTTTTTCTACCATTTCTCTGTTGGATACGAATATGAATATAGTTTGAAGTGGCGGTTTCGTCGTCTCCTGTGTCGGCGAAAGGATCAAATGATTTCAGATTCTCAATGGACATACGATTTGCTTCAGCTATATTAATATATTCCTTGTCTTTTTTGAAAAAGAATAGAAAGGAGAAAACCCCCAGCACGAAACGAAAACAACAAGTAGCTCTTCTCTTGTTTTGTCCTTTTGCAGTTTGCTTTTATCCCTGTGATGAAAAAAAAAAAAACTAAAATTTTTTGCCGGCGCATCGAAAAAATCTGTTACCCGACCC…	/
6712	pRS306 with Ent1∆Ub	This study	Fig. 5	AAAGTGGCTTGTTTAGGCTTCTTACCGGCAGAGGAAGGTAATGAGGATGACATCAATAATGGCAATCTTGATTTCAAGGGACGTGCAGATGAAAGAAGGCAACCGGTCAGTAATCTGCGCATGTAATTGATGAACAATGACGTTAAAAGCTGCTCTAAACCTCCAAAATCATTACTTTTATTTTTGAACAAAGTACAGCGAGATGCAAACGCATGGCTTATTGCAGCTAAATTTCACTTTCACGCGTTTTCGCGTTAAGGTGAAAAATTCCATCAGCCATCTCAAGTGGAGGAACACATCGAAGCGAGCAAAAAGATGACAGAGTTAAACAGCAATAGAACCAGCGGCTGCAGTACGAATTCCTATTGCAAGTCTTACGGAAGGTTGGTGGGGCCTTAT…	/
6713	pRS306 with Ent2∆Ub	This study	Fig. 5	GATAGATAGATGGCCGAACGTGGACTGCCTCTATGGGTACAATAACATATGCACATGGCAACGGGTCTTGGTGCTCAATCGACGGGCACATACACCCTGACTTTCCCCATCATACGACGATGCTCTAGTAAACTTGCACCCGCACCTGTTAGATAAACAAGTGCGCCCAAGATCACAATACCGAAGGGGCGATATCACCACTCAGTATTCTACAGTCGAGCATAGCGTAGTCTGGCAGTATCCCGCACGATCCATTGTATTGTTTGTCCAAACCGCATTTTATGTGTAACGATTAATCGTATATACATGGCCTACAAGAAATTACCCTGCGGCGAAGGGTGAAAAAAAAAGTAGTGGAAACTAAAGAAAGAAGAGTTTAGTTACGGACCCTTTCAAGGA…	/
6704	Fur4-∆60(a.a.61-633)_GFP in low copy URA3 plasmid pRS316	This study	Fig. 5	cggggaaagccggcgaacgtggcgagaaaggaagggaagaaagcgaaaggagcgggcgctagggcgctggcaagtgtagcggtcacgctgcgcgtaaccaccacacccgccgcgcttaatgcgccgctacagggcgcgtcgcgccattcgccattcaggctgcgcaactgttgggaagggcgatcggtgcgggcctcttcgctattacgccagctggcgaaggggggatgtgctgcaaggcgattaagttgggtaacgccagggttttcccagtcacgacgttgtaaaacgacggccagtgaattgtaatacgactcactatagggcgaattggagctccacATATGCTTTCAACCGCTGCGTTTTGGATACCTATTCTTGACATGATATGACTACCAT…	/
