# Supplementary material for: ANTH domains within CALM, HIP1R, and Sla2 recognize ubiquitin internalization signals
Source: eLife. 2021 Nov 25;10:e72583. doi: 10.7554/eLife.72583 (PMC8648300; doi:10.7554/eLife.72583)
Supplement: Supplementary file 2. [file elife-72583-supp2.xlsx]

## Sheet: Sheet1
	Table 4. YEAST Strains Used
Yeast strain	Name and Important Mutations #	Figure used	Genotype
5578	GPY1805; ste2∆::LEU2		MAT A ura3-52 leu2-3,112 his-∆200 trp1-∆901 lys2-801 suc2-∆9 sst1::LYS2 ste2::LEU2
5788	STE2:KanMX	Fig.5C, S5-1C	MAT A ura3-52 leu2-3,112 his-∆200 trp1-∆901 lys2-801 suc2-∆9 sst1::LYS2
5795	Ste2-∆C:KanMX	Fig.5C, S5-1C	MAT A ura3-52 leu2-3,112 his-∆200 trp1-∆901 lys2-801 suc2-∆9 sst1::LYS2
5797	Ste2-∆C:KanMX 3xANTH∆Ub	Fig. S5-1C	MAT A ura3-52 leu2-3,112 his-∆200 trp1-∆901 lys2-801 suc2-∆9 sst1::LYS2
5860	Ste2-∆C:KanMX 3xANTH∆Ub ent1∆Ub ent2∆Ub	Fig.5E, S5-1C	MAT A ura3-52 leu2-3,112 his-∆200 trp1-∆901 lys2-801 suc2-∆9 sst1::LYS2
5947	Ste2-∆C:KanMX 3xANTH∆Ub ent1∆Ub ent2∆Ub ede1∆UBA	Fig.5E, S5-1C	MAT A ura3-52 leu2-3,112 his-∆200 trp1-∆901 lys2-801 suc2-∆9 sst1::LYS2
6003	Ste2-∆C:KanMX 3xANTH∆Ub* ent1∆Ub ent2∆Ub ede1∆UBA	Fig. S5-1C	MAT A ura3-52 leu2-3,112 his-∆200 trp1-∆901 lys2-801 suc2-∆9 sst1::LYS2
5859	Ste2-∆C:KanMX 3xANTH∆Ub ent1∆Ub	Fig. S5-1C	MAT A ura3-52 leu2-3,112 his-∆200 trp1-∆901 lys2-801 suc2-∆9 sst1::LYS2
6326	Ste2-∆C:KanMX ede1∆UBA ent1∆Ub ent2∆Ub	Fig.5E, S5-1C	MAT A ura3-52 leu2-3,112 his-∆200 trp1-∆901 lys2-801 suc2-∆9 sst1::LYS2
5957	Ste2-∆C:KanMX ede1∆UBA	S5-1C	MAT A ura3-52 leu2-3,112 his-∆200 trp1-∆901 lys2-801 suc2-∆9 sst1::LYS2
6014	Ste2-∆C:KanMX 3xANTH∆Ub* ent1∆Ub ent2∆Ub ede1∆UBA lsb5∆	Fig. S5-1C	MAT A ura3-52 leu2-3,112 his-∆200 trp1-∆901 lys2-801 suc2-∆9 sst1::LYS2
6001	Ste2-∆C:KanMX Sla2∆Ub yap1801∆ yap1802∆	Fig. S5-1C	MAT A ura3-52 leu2-3,112 his-∆200 trp1-∆901 lys2-801 suc2-∆9 sst1::LYS2
5887	Ste2-8K>R:KanMX	Fig. 5C,F and Fig. S5-1C	MAT A ura3-52 leu2-3,112 his-∆200 trp1-∆901 lys2-801 suc2-∆9 sst1::LYS2
5901	Ste2-8K>R:KanMX 3xANTH∆Ub	Fig. 5F and Fig. S5-1C	MAT A ura3-52 leu2-3,112 his-∆200 trp1-∆901 lys2-801 suc2-∆9 sst1::LYS2
5899	Ste2-8K>R:KanMX 3xANTH∆Ub ent1∆Ub ent2∆Ub	Fig. 5F and Fig. S5-1C	MAT A ura3-52 leu2-3,112 his-∆200 trp1-∆901 lys2-801 suc2-∆9 sst1::LYS2
5961	Ste2-8K>R:KanMX 3xANTH∆Ub ent1∆Ub ent2∆Ub ede1∆UBA	Fig. 5F and Fig. S5-1C	MAT A ura3-52 leu2-3,112 his-∆200 trp1-∆901 lys2-801 suc2-∆9 sst1::LYS2
5888	Ste2-∆C, K>R:KanMX	Fig.5C,E and Fig.S5-1C	MAT A ura3-52 leu2-3,112 his-∆200 trp1-∆901 lys2-801 suc2-∆9 sst1::LYS2
3581	PJ69-4A for Y2H with pGal4-BD TRP1 plasmids	Fig. S4D	MAT A ura3-52, leu2-3, 112, his3-200, trp1-901, gal4delta, gal80delta, lys2::Gal1-His3, Gal2-AdeltaE2, met::Gla7-lacZ
5725	for Y2H with pGal4-AD LEU2 plasmids	Fig. S4D	MAT alpha 4∆ trp1∆ Gal80∆ his3∆1 leu2∆0 lys2∆0 ura3∆0
	# Description of yeast mutations
ent1∆Ub	UIM1 (E165NDAALQRTTSAERLTAEED) UIM2 (K189QDAAYETTTQLEKEEEELK)
ent2∆Ub	UIM1 (S175YQAALEKTTEEDRITAQED) UIM2 (D206EAPDFQATTQLDKEEEELK)
3xANTH∆Ub	yap1801 (F213A, E214S) yap1802 (F207A,E208A) sla2 (L212A, D218A)
3xANTH∆Ub*	yap1801 (F213A, E214S) yap1802 (F207A,E208A) sla2 (L212S, D218R )
ede1∆UBA	K1342stop_loxp
Ste2-∆C:KanMX	has truncation of Ste2 after residue 344
Ste2-∆C,K>R:KanMX	has truncation of Ste2 after residue 344, and K337R
Ste2-8K>R:KanMX	K304R K337R K352R K358R K374R K387R K400R K422R
