# Supplementary figures and images for: ANTH domains within CALM, HIP1R, and Sla2 recognize ubiquitin internalization signals
Source: eLife journal article supplement (doi:10.7554/elife.72583), 2021-11-25

**A**

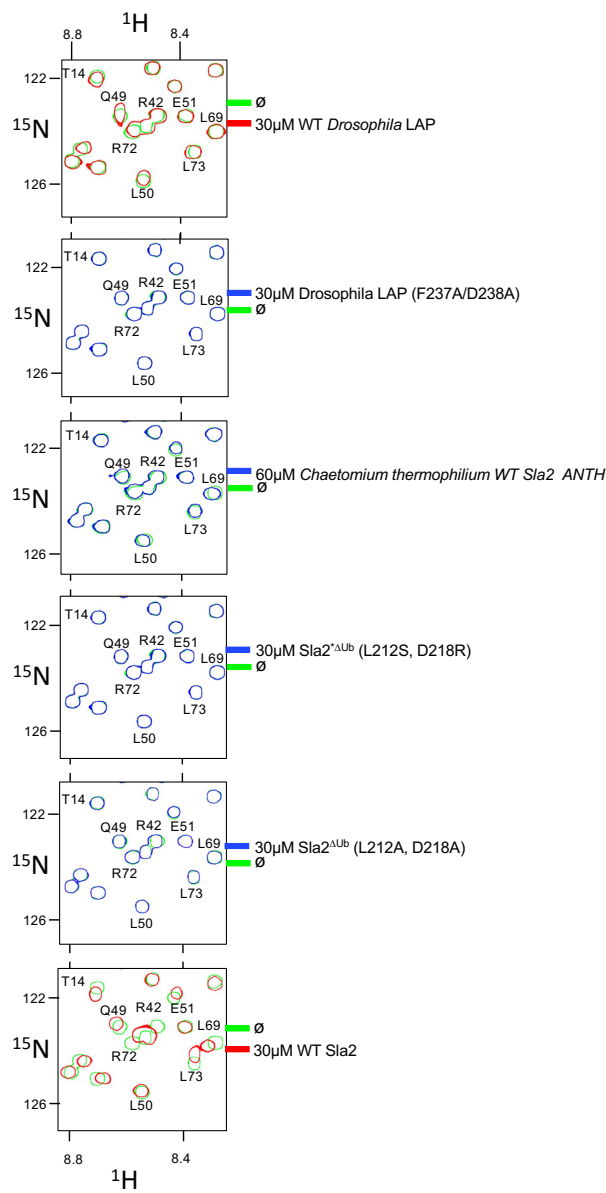

Supplement: supp [file elife-72583-supp-v1.zip]

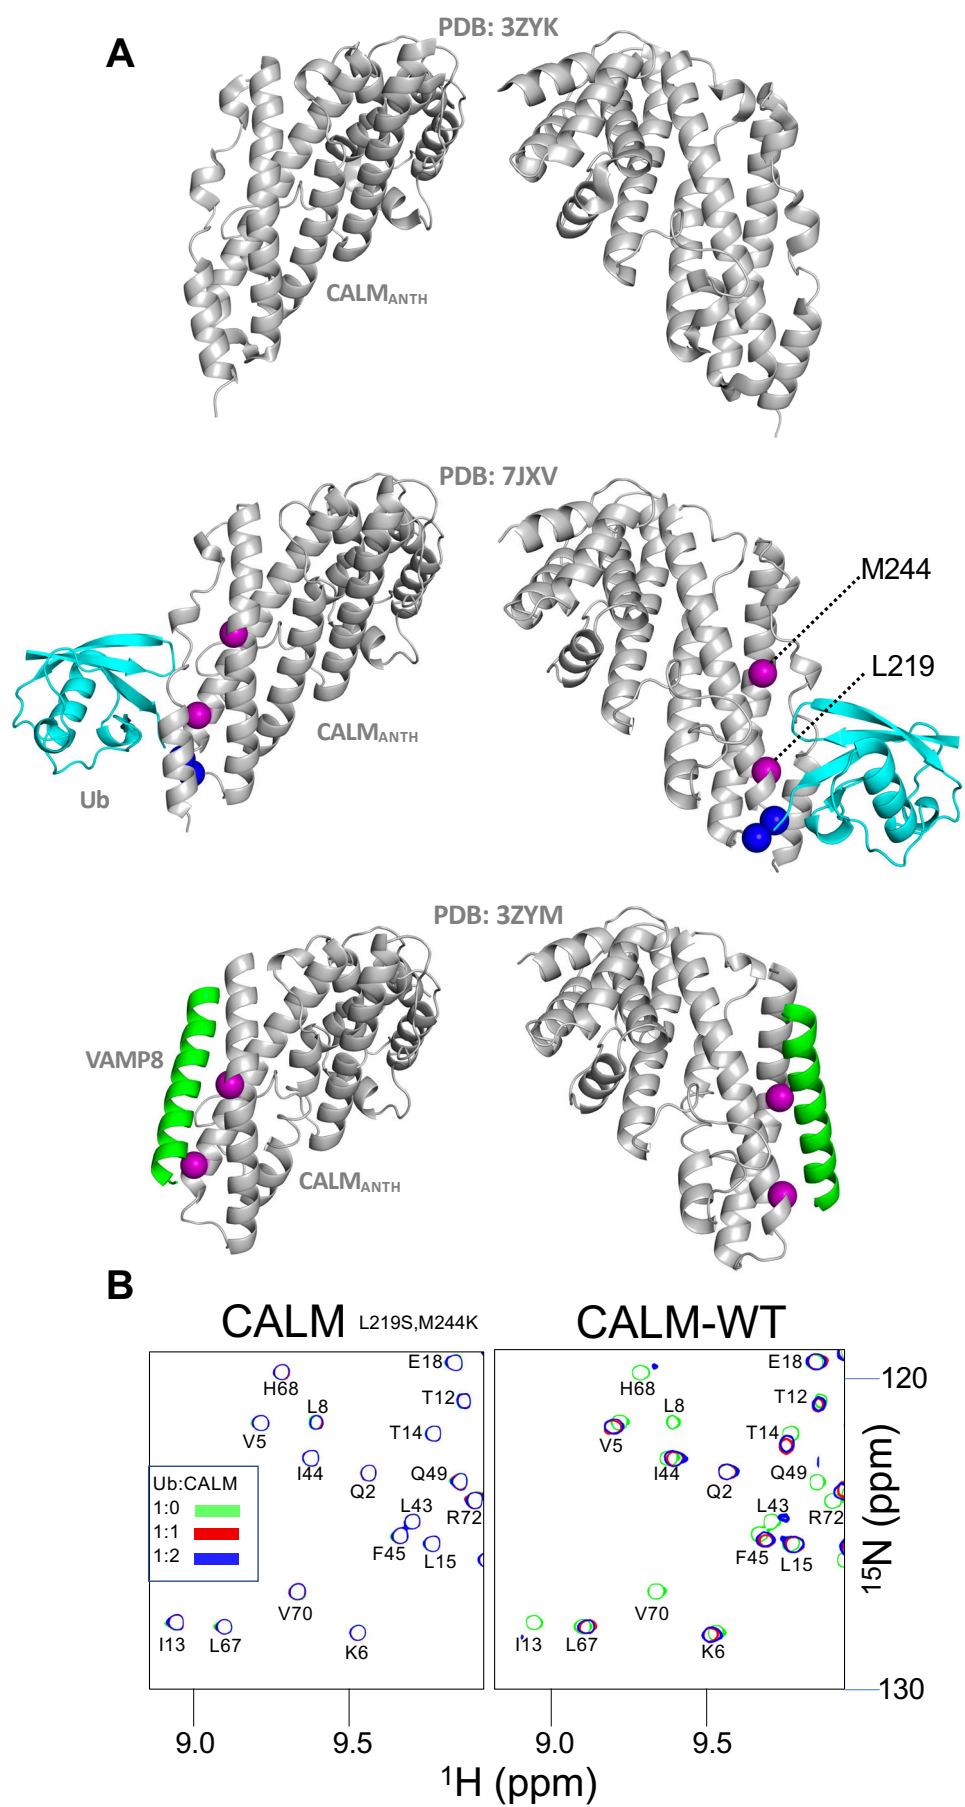

Supplement: supp [file elife-72583-supp-v1.zip]

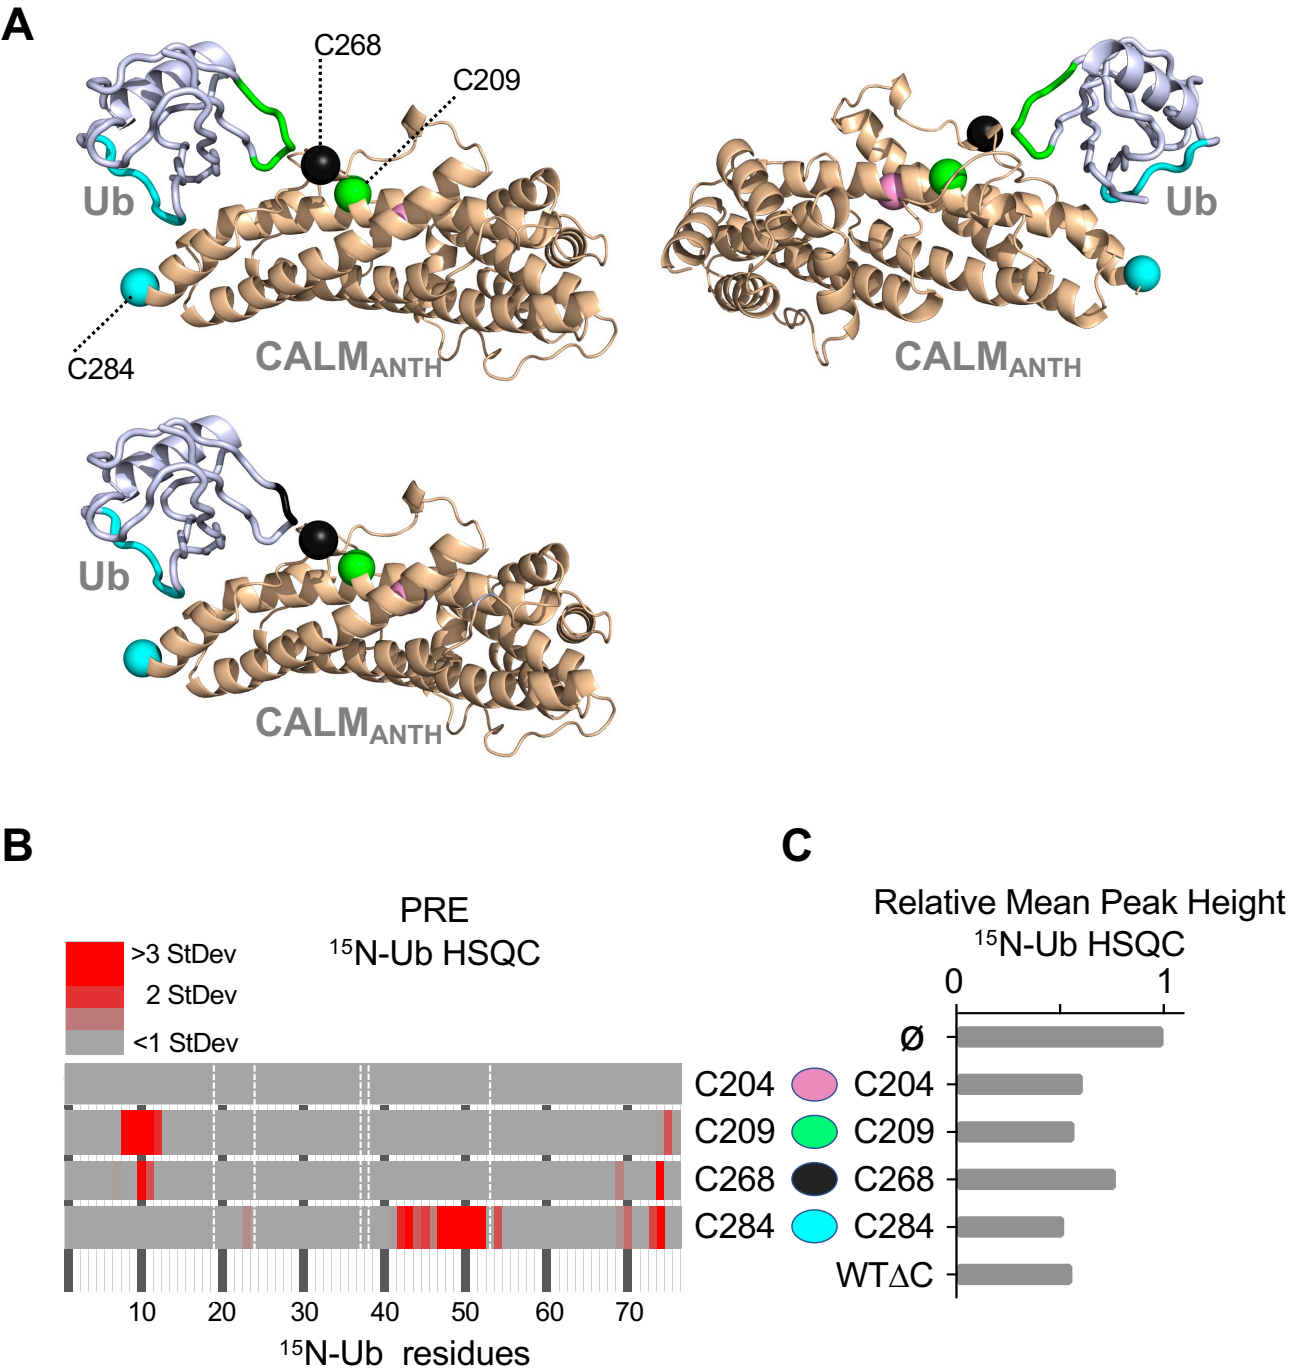

Supplement: supp [file elife-72583-supp-v1.zip]

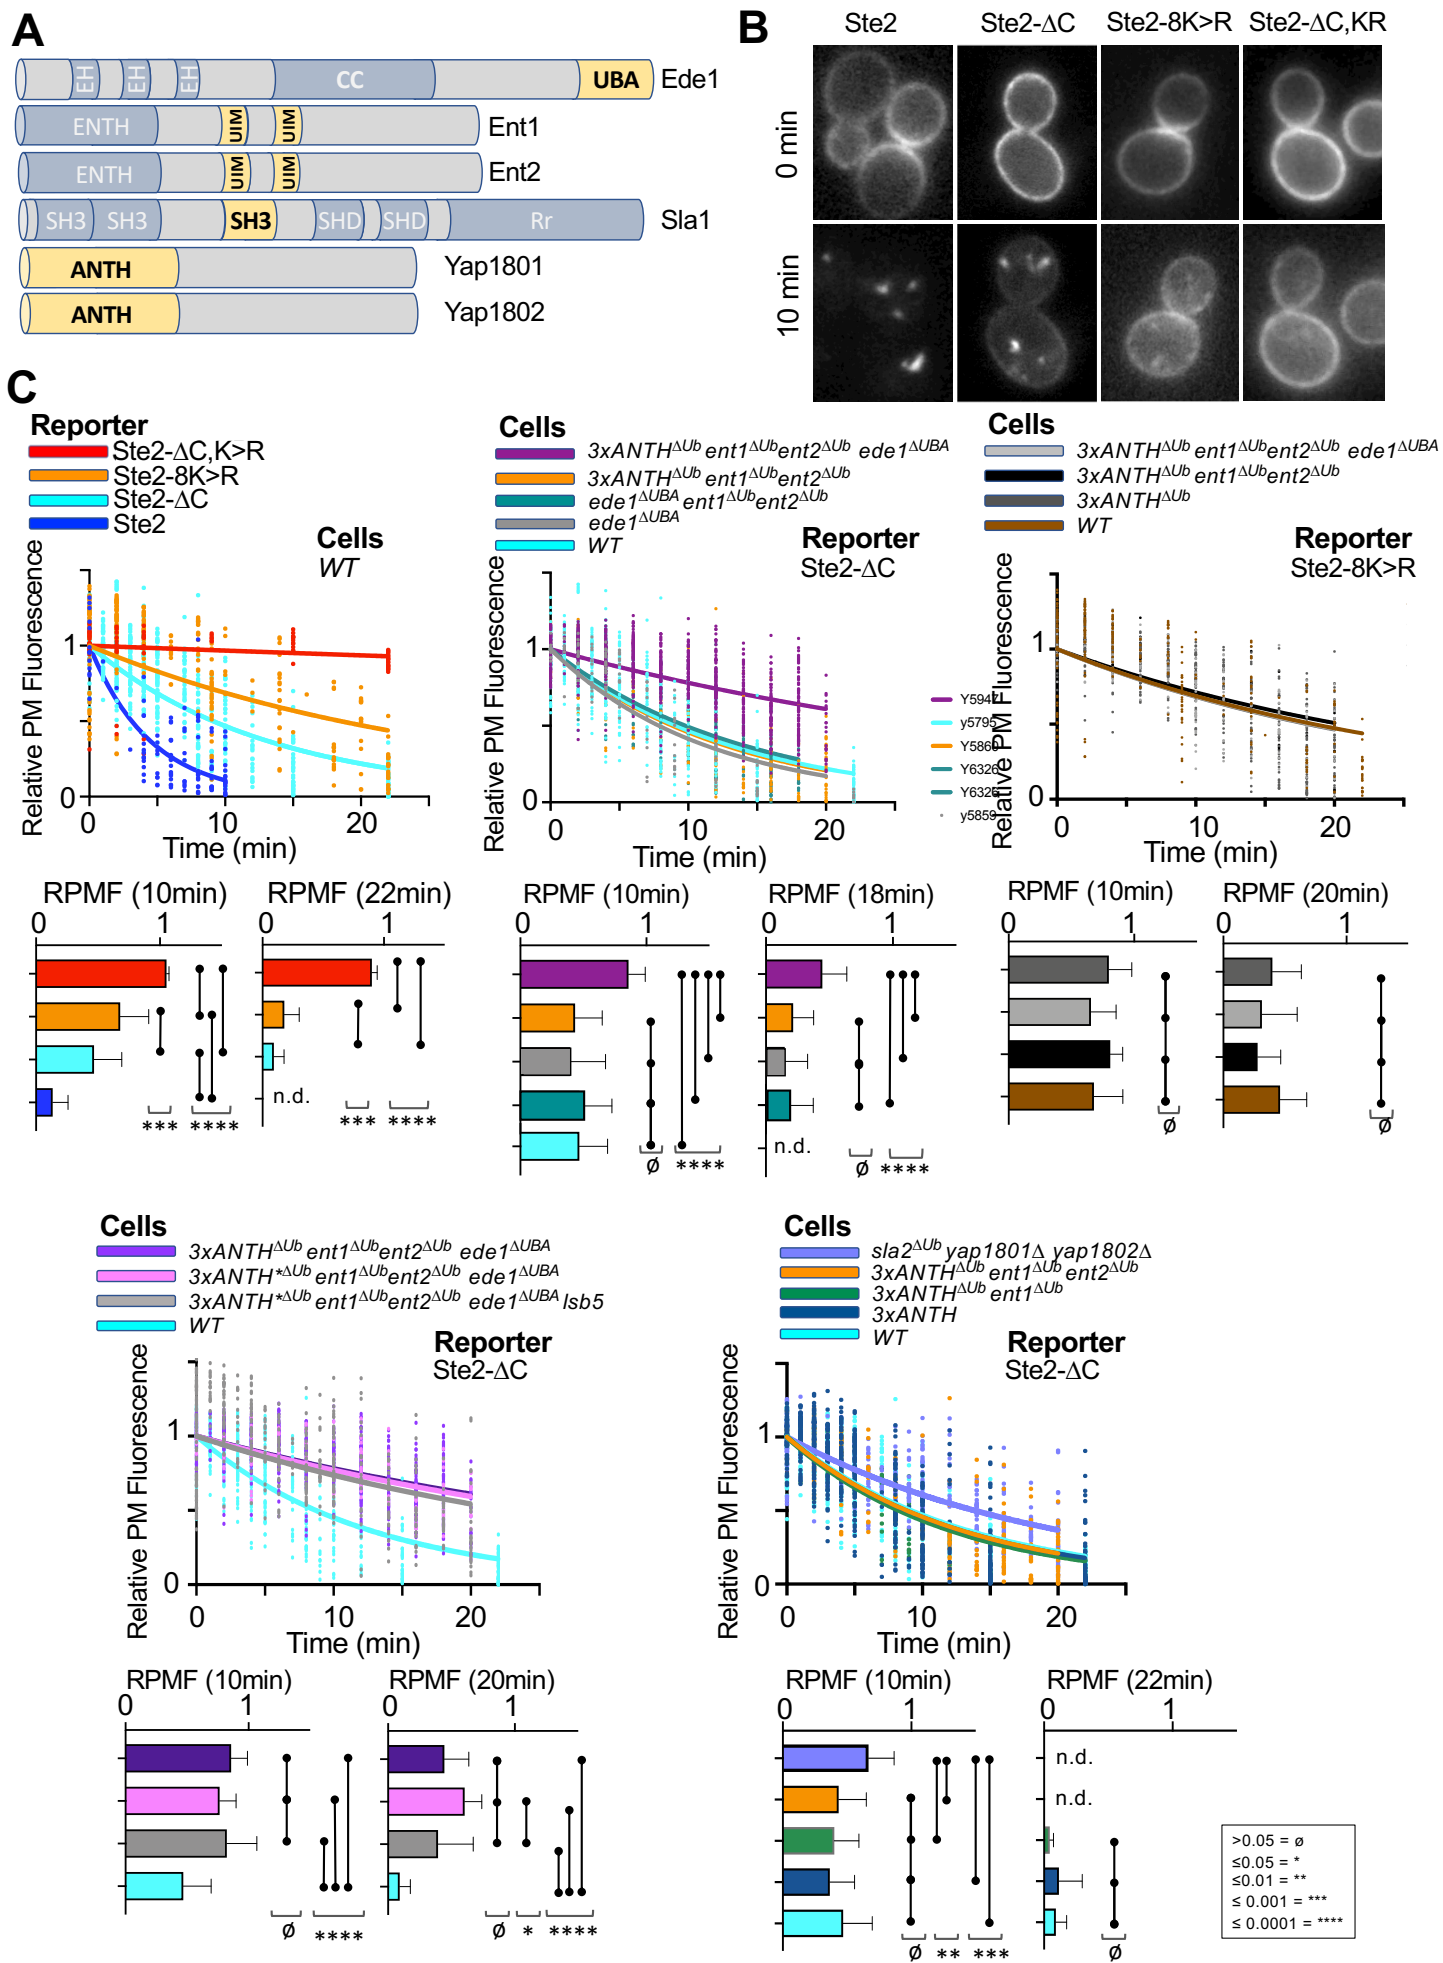

Supplement: supp [file elife-72583-supp-v1.zip]

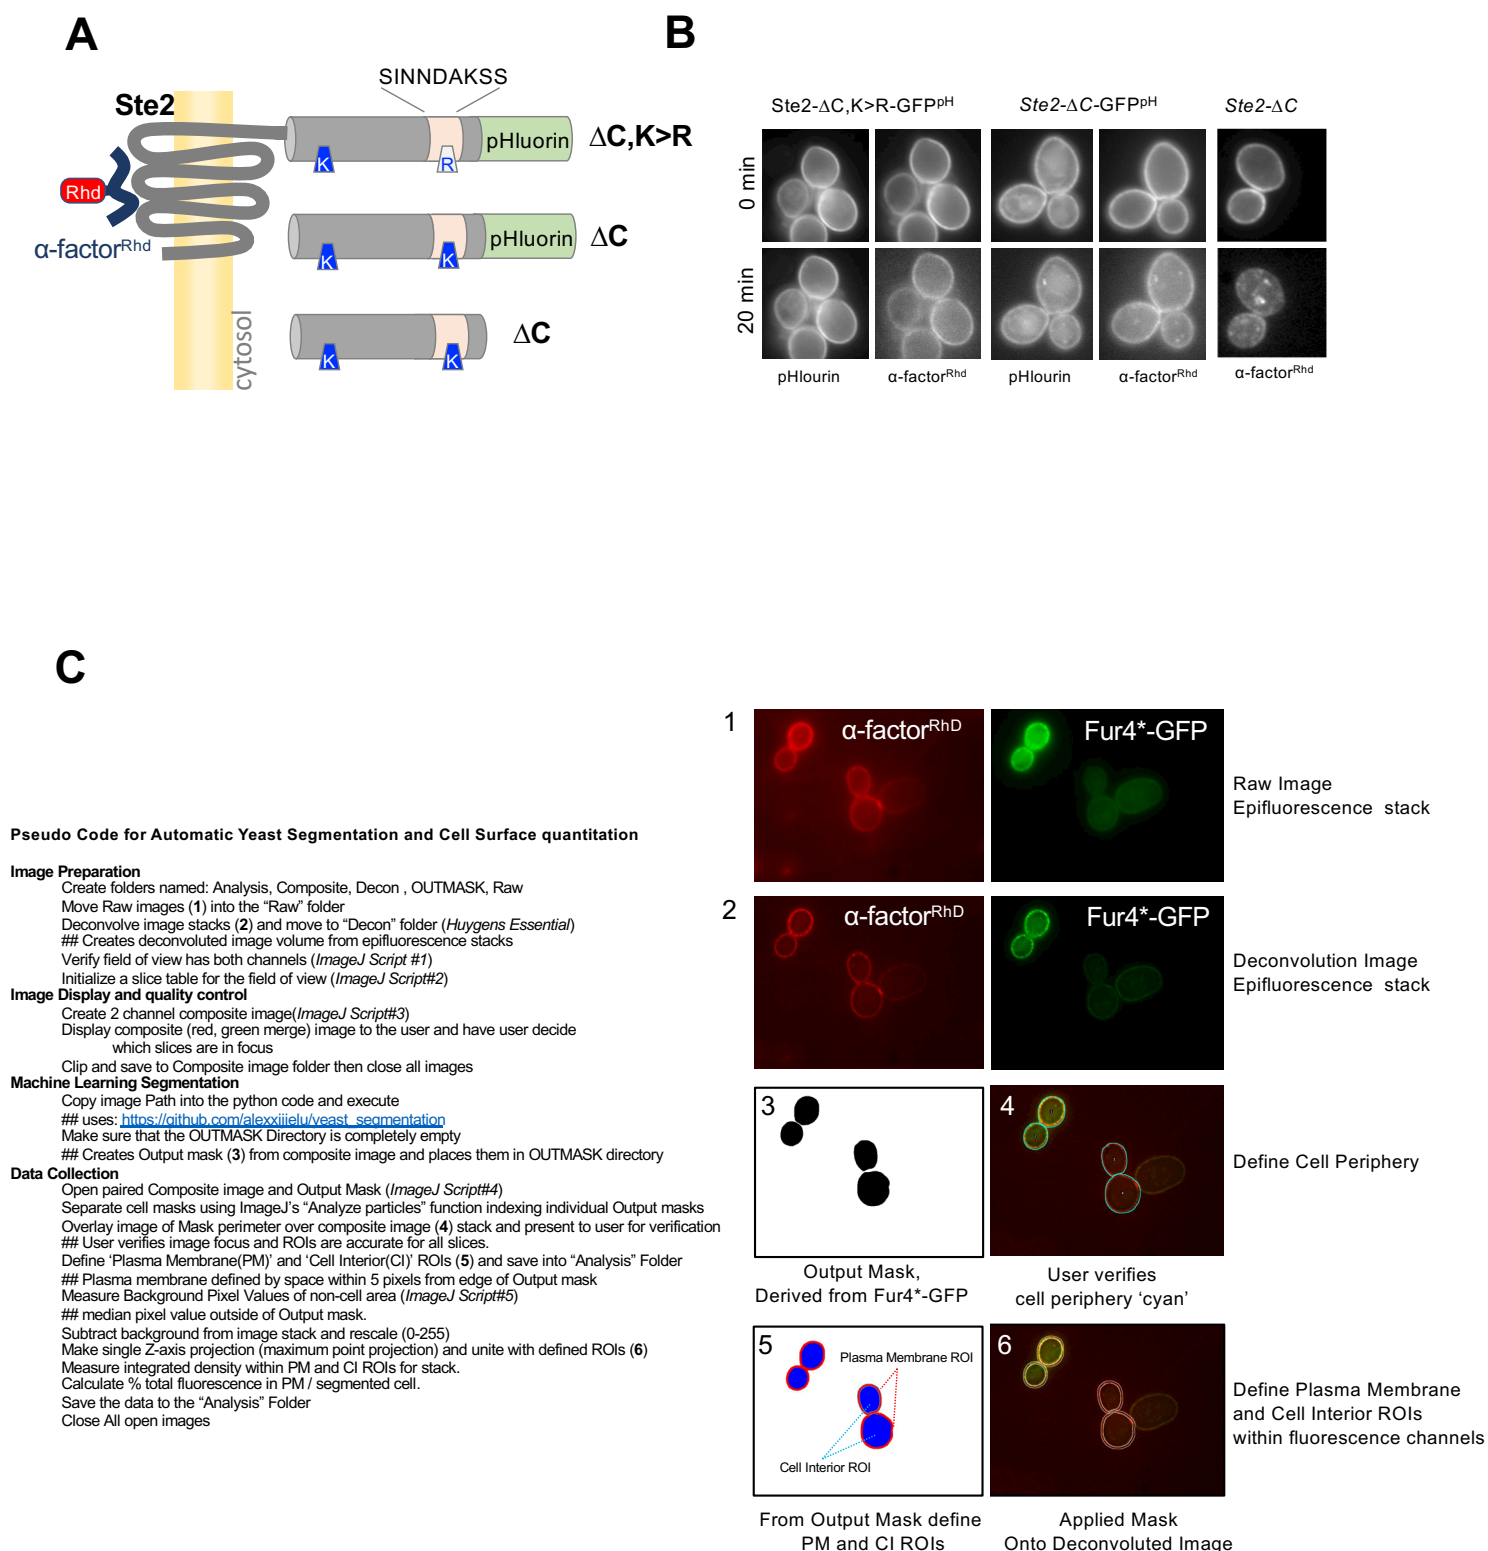

Supplement: supp [file elife-72583-supp-v1.zip]

**A**

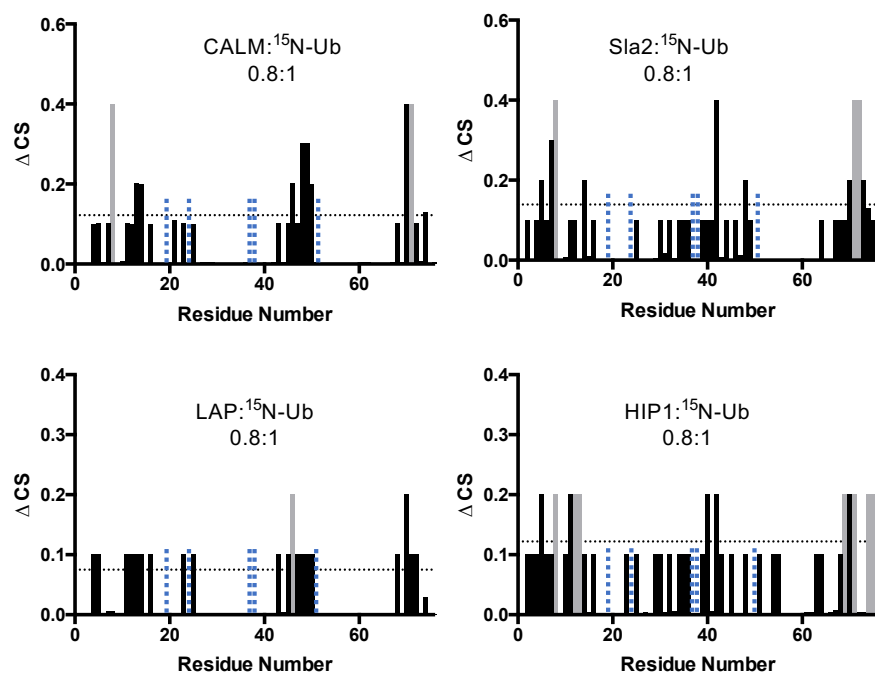

**B**

Ub: $^{15}N$ -HIP1-ANTH  
1:1 (90 $\mu$ M:90 $\mu$ M)

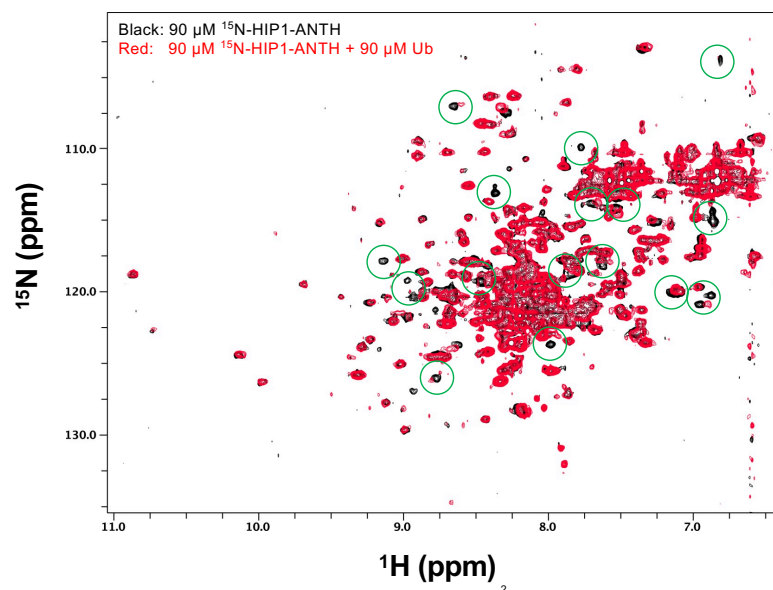

Supplement: supp [file elife-72583-supp-v1.zip]

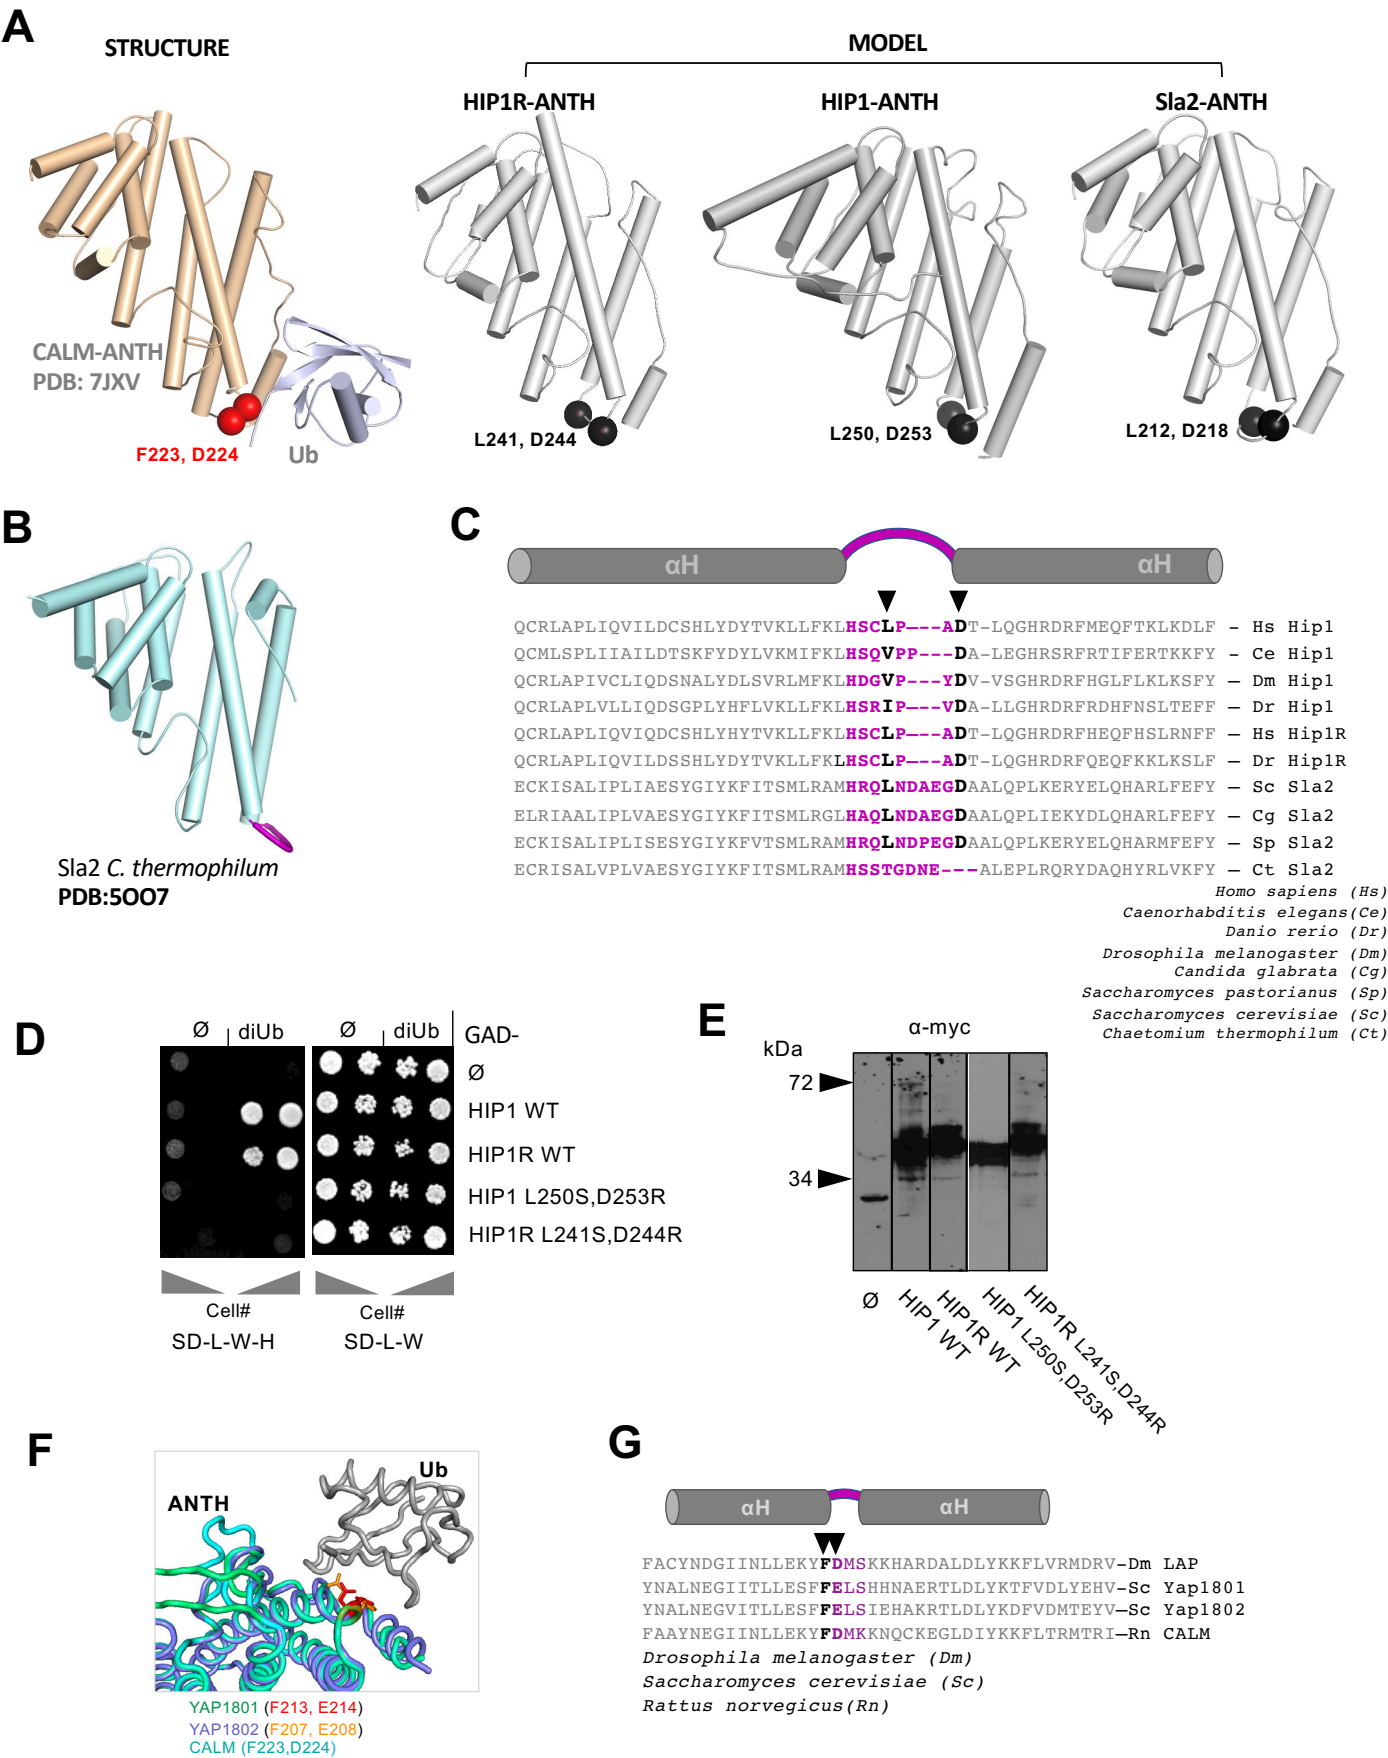

Supplement: supp [file elife-72583-supp-v1.zip]
